# Supplementary material
Source: publisher figshare collection journal article supplement (https://acs.figshare.com/ndownloader/files/13237409)
Supplement: Supplementary file 1 [file 13237409]

# Supporting Information

## **Methionine-Containing Rhabdopeptide/Xenortide-like Peptides from Heterologous Expression of the Biosynthetic Gene Cluster *kj12ABC* in *Escherichia coli***

Lei Zhao,<sup>†,‡</sup> Xiaofeng Cai,<sup>†</sup> Marcel Kaiser,<sup>§,⊥</sup> and Helge B. Bode<sup>†,||,\*</sup>

<sup>†</sup>Molekulare Biotechnologie, Fachbereich Biowissenschaften, Goethe Universität Frankfurt, 60438  
Frankfurt am Main, Germany

<sup>‡</sup>Institute of Botany, Jiangsu Province and Chinese Academy of Sciences, 210014 Nanjing, China

<sup>§</sup>Parasite Chemotherapy, Swiss Tropical and Public Health Institute, 4051 Basel, Switzerland

<sup>⊥</sup>University of Basel, 4003 Basel, Switzerland

<sup>||</sup>Buchmann Institute for Molecular Life Sciences (BMLS), Goethe Universität Frankfurt, 60438  
Frankfurt am Main, Germany

\*Corresponding author: E-mail: [h.bode@bio.uni-frankfurt.de](mailto:h.bode@bio.uni-frankfurt.de)

## Supplementary Methods

### Chemical synthesis

The synthesis was performed manually using stepwise solid phase peptide synthesis (SPPS) method.<sup>1,2</sup> For a schematic overview see Scheme 1. Synthesis of compound **1** was shown as an example. At step **a**, the attachment of the C-terminal amine phenylethylamine (PEA) on the 2-(3,5-dimethoxy-4-formylphenoxy)ethyl (DFPE) resin was carried out. A mixture of PEA (126  $\mu$ L, 1.0 mmol, 10 eq.) in 1.4 mL *N,N*-dimethylformamide (DMF)/MeOH/AcOH (80:19:1), NaBH<sub>3</sub>CN (62.8 mg, 1.0 mmol, 10 eq.) and DFPE resin (95.2 mg, 0.1 mmol, 1 eq.) were placed in a 2 mL Eppendorf tube and incubated in a thermoshaker at 60 °C overnight. The resin was filtered, and subsequently washed with DMF (5  $\times$ ) and dichloromethane (DCM) (5  $\times$ ), and dried. At step **b**, acylation of *N*-Me-L-Val was conducted. A solution of Fmoc-*N*-Me-Val-OH (353.4 mg, 1.0 mmol, 10 eq.), *N*-[(dimethylamino)-1*H*-1,2,3-triazolo[4,5-*b*]-pyridino-1-ylmethylene]-*N*-methylmethanaminium hexafluorophosphate (HATU) (381 mg, 1.0 mmol, 10 eq), 1-hydroxy-7-azabenzotriazole (HOAt) (136 mg, 1.0 mmol, 10 eq) and *N,N*-diisopropylethylamine (DIPEA) (0.34 mL, 2.0 mmol, 20 eq.) in 2.0 mL DMF was added to resin. The resulting mixture was incubated in a plastic reactor vessel equipped with a Teflon frit at room temperature overnight. The resin was washed with DMF (5  $\times$ ) and DCM (5  $\times$ ) and treated with 20% piperidine in DMF (3  $\times$  10 min, 2 mL) to remove the Fmoc protecting group. Afterwards the resin was washed with DCM (5  $\times$ ) and dried. At step **c**, *N*-Me-L-Met was coupled to peptide sequence. The coupling of Fmoc-*N*-Me-Met-OH was mediated by using the efficient and rapid BTC coupling reagent. The dried peptidyl resin (25  $\mu$ mol) was swollen with dry tetrahydrofuran (THF) (1 mL) for 15 min; meantime, in a separate flask, bis-(trichloromethyl)carbonate (BTC) (8.5 mg, 28.3  $\mu$ mol, 1.15 eq.) was dissolved in dry THF (0.7 mL), and the Fmoc-*N*-Me-Met-OH (28.9 mg, 75  $\mu$ mol, 3 eq.) was added to it, which resulted in a clear amino acid solution. Collidine (34  $\mu$ L, 250  $\mu$ mol, 10 eq.) was added to this clear solution, and a precipitate was immediately formed. This precipitate was added to the resin beads, which were pre-mixed with DIPEA (35  $\mu$ L, 200  $\mu$ mol, 8 eq.), and the whole reaction mixture was shaken at room temperature for 2 h. The resin was washed with DMF (5  $\times$ ) and DCM (5  $\times$ ) and treated with 20% piperidine in DMF (3  $\times$  10 min, 2 mL) to remove the Fmoc protecting group. Afterwards the resin was washed with DCM (5  $\times$ ) and dried. At step **d**, The L-Val was coupled by using the HATU/HOAt coupling reagent. The dried peptidyl resin (25  $\mu$ mol) was swollen in DMF. A solution of Fmoc-Val-OH (25.5 mg, 75  $\mu$ mol, 3 eq.), HATU (28.6 mg, 75  $\mu$ mol,

3 eq.), HOAt (10.2 mg, 75  $\mu$ mol, 3 eq.) and DIPEA (25.5  $\mu$ L, 150  $\mu$ mol, 6 eq.) in 0.5 mL DMF was added to resin and shaken at room temperature overnight. The resin was washed with DMF (5  $\times$ ) and DCM (5  $\times$ ) and treated with 20% piperidine in DMF (3  $\times$  10 min, 2 mL) to remove the Fmoc protecting group. Afterwards the resin was washed with DCM (5  $\times$ ) and dried. At step **e**, *N*-Me-L-Val was coupled to peptide sequence using the same method as step **c**. At the final step **f**, the peptide was cleaved from the resin. A total of 1 mL trifluoroacetic acid (TFA)/triisopropylsilane (TIS)/water (95:2.5:2.5) was added to the peptidyl resin (25  $\mu$ mol) and the mixture was agitated for at least 2 h at room temperature. The resin was removed by filtration and washed twice with TFA. The solution was concentrated *in vacuo*. The residue was purified by Agilent HPLC system. The structures of pure compounds were confirmed by HR-MS, 1D and 2D NMR.

## Supplementary Tables

**Table S1.** HR-MS data of natural and synthetic **1–7**, **10** and **12**

| compound  | sum formula                                                     | $m/z$ calcd. $[M + H]^+$ | natural                 |              | synthetic               |              |
|-----------|-----------------------------------------------------------------|--------------------------|-------------------------|--------------|-------------------------|--------------|
|           |                                                                 |                          | $m/z$ found $[M + H]^+$ | $\Delta$ ppm | $m/z$ found $[M + H]^+$ | $\Delta$ ppm |
| <b>1</b>  | C <sub>31</sub> H <sub>53</sub> N <sub>5</sub> O <sub>4</sub> S | 592.3891                 | 592.3887                | 0.7          | 592.3878                | 2.2          |
| <b>2</b>  | C <sub>31</sub> H <sub>53</sub> N <sub>5</sub> O <sub>4</sub> S | 592.3891                 | 592.3887                | 0.7          | 592.3886                | 0.8          |
| <b>3</b>  | C <sub>31</sub> H <sub>53</sub> N <sub>5</sub> O <sub>4</sub> S | 592.3891                 | 592.3882                | 1.5          | 592.3885                | 1.0          |
| <b>4</b>  | C <sub>36</sub> H <sub>62</sub> N <sub>6</sub> O <sub>5</sub> S | 691.4575                 | 691.4559                | 2.3          | 691.4564                | 1.6          |
| <b>5</b>  | C <sub>37</sub> H <sub>64</sub> N <sub>6</sub> O <sub>5</sub> S | 705.4732                 | 705.4717                | 2.1          | 705.4717                | 2.1          |
| <b>6</b>  | C <sub>37</sub> H <sub>64</sub> N <sub>6</sub> O <sub>5</sub> S | 705.4732                 | 705.4717                | 2.1          | 705.4723                | 1.2          |
| <b>7</b>  | C <sub>37</sub> H <sub>64</sub> N <sub>6</sub> O <sub>5</sub> S | 705.4732                 | 705.4727                | 0.7          | 705.4723                | 1.2          |
| <b>10</b> | C <sub>31</sub> H <sub>53</sub> N <sub>5</sub> O <sub>4</sub>   | 560.4170                 | 560.4164                | 1.2          | 560.4165                | 0.9          |
| <b>12</b> | C <sub>37</sub> H <sub>64</sub> N <sub>6</sub> O <sub>5</sub>   | 673.5011                 | 673.5000                | 1.7          | 673.5003                | 1.2          |

**Table S2.**  $^1\text{H}$  (500 MHz) and  $^{13}\text{C}$  (125 MHz) NMR Data of **1** in Methanol- $d_4$  ( $\delta$  in ppm,  $J$  in Hz)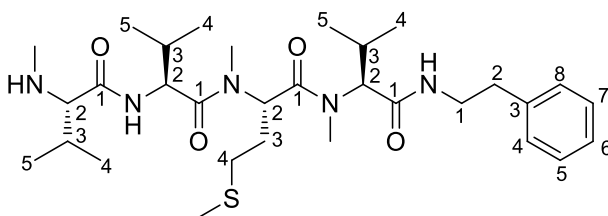

| subunit    | position          | $\delta_{\text{C}}$     | $\delta_{\text{H}}$     |
|------------|-------------------|-------------------------|-------------------------|
| N-Me-L-Val | 1                 | 168.1 (C)               |                         |
|            | 2                 | 68.2 (CH)               | 3.68, d (5.5)           |
|            | 3                 | 31.7 (CH)               | 2.24–2.14, m            |
|            | 4                 | 18.8 (CH <sub>3</sub> ) | 1.07, d (6.3)           |
|            | 5                 | 18.7 (CH <sub>3</sub> ) | 1.03, d (6.9)           |
|            | N-CH <sub>3</sub> | 33.3                    | 2.65, s                 |
| L-Val      | 1                 | 173.8 (C)               |                         |
|            | 2                 | 56.9 (CH)               | 4.70, d (7.6)           |
|            | 3                 | 31.6 (CH)               | 2.13–2.04, m            |
|            | 4                 | 18.6 (CH <sub>3</sub> ) | 1.01, d (6.8)           |
|            | 5                 | 19.9 (CH <sub>3</sub> ) | 0.99, d (6.8)           |
| N-Me-L-Met | 1                 | 172.8 (C)               |                         |
|            | 2                 | 53.8 (CH)               | 5.64, dd (8.4, 6.1)     |
|            | 3                 | 29.5 (CH <sub>2</sub> ) | 2.04–1.96, 1.96–1.88, m |
|            | 4                 | 31.4 (CH <sub>2</sub> ) | 2.39, t (7.2)           |
|            | S-CH <sub>3</sub> | 15.4                    | 2.07, s                 |
|            | N-CH <sub>3</sub> | 31.7                    | 3.11, s                 |
| N-Me-L-Val | 1                 | 171.7 (C)               |                         |
|            | 2                 | 64.0 (CH)               | 4.53, d (11.1)          |
|            | 3                 | 27.6 (CH)               | 2.24–2.14, m            |
|            | 4                 | 19.9 (CH <sub>3</sub> ) | 0.87, d (6.4)           |
|            | 5                 | 19.2 (CH <sub>3</sub> ) | 0.76, d (6.6)           |
|            | N-CH <sub>3</sub> | 31.5                    | 2.95, s                 |
| PEA        | 1                 | 41.6 (CH <sub>2</sub> ) | 3.54–3.47, 3.41–3.33, m |
|            | 2                 | 36.5 (CH <sub>2</sub> ) | 2.84–2.72, m            |
|            | 3                 | 140.5 (C)               |                         |
|            | 4                 | 130.0 (CH)              | 7.19, overlap           |
|            | 5                 | 129.7 (CH)              | 7.27, overlap           |
|            | 6                 | 127.6 (CH)              | 7.19, overlap           |
|            | 7                 | 129.7 (CH)              | 7.27, overlap           |
|            | 8                 | 130.0 (CH)              | 7.19, overlap           |

**Table S3.**  $^1\text{H}$  (500 MHz) and  $^{13}\text{C}$  (125 MHz) NMR Data of **2** in Methanol- $d_4$  ( $\delta$  in ppm,  $J$  in Hz)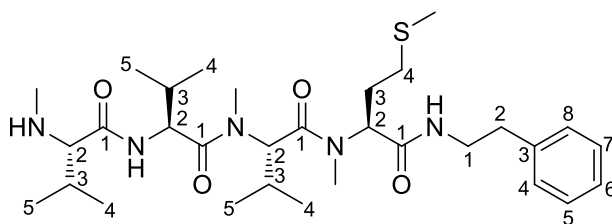

| subunit    | position          | $\delta_c$              | $\delta_H$              |
|------------|-------------------|-------------------------|-------------------------|
| N-Me-L-Val | 1                 | 168.0 (qC)              |                         |
|            | 2                 | 68.2 (CH)               | 3.67, d (5.4)           |
|            | 3                 | 31.7 (CH)               | 2.20–2.12, m            |
|            | 4                 | 18.7 (CH <sub>3</sub> ) | 1.03, d (7.0)           |
|            | 5                 | 18.5 (CH <sub>3</sub> ) | 1.00, overlap           |
|            | N-CH <sub>3</sub> | 33.3 (CH <sub>3</sub> ) | 2.63, s                 |
| L-Val      | 1                 | 174.1 (qC)              |                         |
|            | 2                 | 56.7 (CH)               | 4.72, d (7.9)           |
|            | 3                 | 31.8 (CH)               | 2.11–2.01, m            |
|            | 4                 | 18.8 (CH <sub>3</sub> ) | 1.00, overlap           |
|            | 5                 | 19.8 (CH <sub>3</sub> ) | 0.95, d (6.8)           |
| N-Me-L-Val | 1                 | 173.0 (qC)              |                         |
|            | 2                 | 59.7 (CH)               | 5.18, d (10.8)          |
|            | 3                 | 28.7 (CH)               | 2.45–2.25, m            |
|            | 4                 | 19.9 (CH <sub>3</sub> ) | 0.88, d (6.4)           |
|            | 5                 | 19.2 (CH <sub>3</sub> ) | 0.79, d (6.6)           |
|            | N-CH <sub>3</sub> | 31.4 (CH <sub>3</sub> ) | 3.12, s                 |
| N-Me-L-Met | 1                 | 172.1 (qC)              |                         |
|            | 2                 | 57.3 (CH)               | 5.09, dd (9.7, 5.8)     |
|            | 3                 | 29.3 (CH <sub>2</sub> ) | 2.11–2.01, 1.92–1.82, m |
|            | 4                 | 31.5 (CH <sub>2</sub> ) | 2.29, t (7.4)           |
|            | S-CH <sub>3</sub> | 15.4 (CH <sub>3</sub> ) | 2.04, s                 |
|            | N-CH <sub>3</sub> | 32.2 (CH <sub>3</sub> ) | 2.97, s                 |
| PEA        | 1                 | 41.9 (CH <sub>2</sub> ) | 3.42, t (7.2)           |
|            | 2                 | 36.6 (CH <sub>2</sub> ) | 2.77, t (7.2)           |
|            | 3                 | 140.5 (qC)              |                         |
|            | 4                 | 130.0 (CH)              | 7.19, overlap           |
|            | 5                 | 129.7 (CH)              | 7.26, overlap           |
|            | 6                 | 127.6 (CH)              | 7.19, overlap           |
|            | 7                 | 129.7 (CH)              | 7.26, overlap           |
|            | 8                 | 130.0 (CH)              | 7.19, overlap           |

**Table S4.**  $^1\text{H}$  (500 MHz) and  $^{13}\text{C}$  (125 MHz) NMR Data of **3** in Methanol- $d_4$  ( $\delta$  in ppm,  $J$  in Hz)

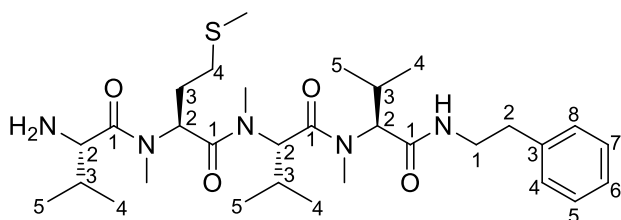

| subunit    | position          | $\delta_c$              | $\delta_H$              |
|------------|-------------------|-------------------------|-------------------------|
| L-Val      | 1                 | 171.0 (qC)              |                         |
|            | 2                 | 57.1 (CH)               | 4.27, d (4.5)           |
|            | 3                 | 30.9 (CH)               | 2.24–2.16, m            |
|            | 4                 | 19.6 (CH <sub>3</sub> ) | 1.11, d (7.0)           |
|            | 5                 | 16.9 (CH <sub>3</sub> ) | 0.99, d (6.9)           |
| N-Me-L-Met | 1                 | 172.6 (qC)              |                         |
|            | 2                 | 53.7 (CH)               | 5.73, t (7.3)           |
|            | 3                 | 29.0 (CH <sub>2</sub> ) | 2.16–2.09, 2.00–1.91, m |
|            | 4                 | 31.4 (CH <sub>2</sub> ) | 2.54–2.41, m            |
|            | S-CH <sub>3</sub> | 15.2 (CH <sub>3</sub> ) | 2.07, s                 |
|            | N-CH <sub>3</sub> | 31.7 (CH <sub>3</sub> ) | 3.08, s                 |
| N-Me-L-Val | 1                 | 172.5 (qC)              |                         |
|            | 2                 | 60.1 (CH)               | 5.09, d (10.8)          |
|            | 3                 | 28.7 (CH)               | 2.35–2.27, m            |
|            | 4                 | 20.0 (CH <sub>3</sub> ) | 0.88, d (6.5)           |
|            | 5                 | 19.0 (CH <sub>3</sub> ) | 0.79, d (6.7)           |
|            | N-CH <sub>3</sub> | 31.1 (CH <sub>3</sub> ) | 3.03, s                 |
| N-Me-L-Val | 1                 | 171.8 (qC)              |                         |
|            | 2                 | 63.9 (CH)               | 4.57, d (11.1)          |
|            | 3                 | 27.8 (CH)               | 2.24–2.16, m            |
|            | 4                 | 19.9 (CH <sub>3</sub> ) | 0.86, d (6.6)           |
|            | 5                 | 19.2 (CH <sub>3</sub> ) | 0.76, d (6.7)           |
|            | N-CH <sub>3</sub> | 31.5 (CH <sub>3</sub> ) | 2.99, s                 |
| PEA        | 1                 | 41.7 (CH <sub>2</sub> ) | 3.50–3.35, m            |
|            | 2                 | 36.6 (CH <sub>2</sub> ) | 2.79–2.74, m            |
|            | 3                 | 140.4 (qC)              |                         |
|            | 4                 | 129.9 (CH)              | 7.19, overlap           |
|            | 5                 | 129.7 (CH)              | 7.26, overlap           |
|            | 6                 | 127.6 (CH)              | 7.19, overlap           |
|            | 7                 | 129.7 (CH)              | 7.26, overlap           |
|            | 8                 | 129.9 (CH)              | 7.19, overlap           |

**Table S5.**  $^1\text{H}$  (500 MHz) and  $^{13}\text{C}$  (125 MHz) NMR Data of **4** in Methanol- $d_4$  ( $\delta$  in ppm,  $J$  in Hz)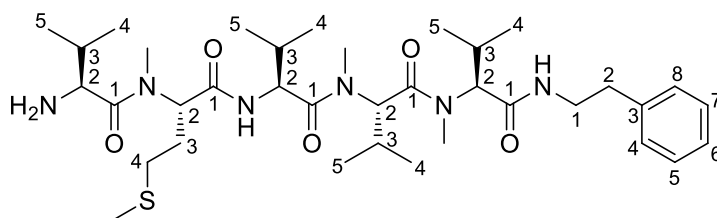

| subunit    | position          | $\delta_c$              | $\delta_H$              |
|------------|-------------------|-------------------------|-------------------------|
| L-Val      | 1                 | 171.5 (qC)              |                         |
|            | 2                 | 57.1 (CH)               | 4.22, d (5.0)           |
|            | 3                 | 31.1 (CH)               | 2.25–2.13, m            |
|            | 4                 | 19.5 (CH <sub>3</sub> ) | 1.11, d (7.0)           |
|            | 5                 | 17.1 (CH <sub>3</sub> ) | 1.01, d (6.9)           |
| N-Me-L-Met | 1                 | 172.0 (qC)              |                         |
|            | 2                 | 57.5 (CH)               | 5.20, d (7.1)           |
|            | 3                 | 29.7 (CH <sub>2</sub> ) | 2.25–2.13, 2.00–1.91, m |
|            | 4                 | 31.4 (CH <sub>2</sub> ) | 2.43, t (7.4)           |
|            | S-CH <sub>3</sub> | 15.4 (CH <sub>3</sub> ) | 2.09, s                 |
|            | N-CH <sub>3</sub> | 32.0 (CH <sub>3</sub> ) | 3.09, s                 |
| L-Val      | 1                 | 174.6 (qC)              |                         |
|            | 2                 | 56.5 (CH)               | 4.60, d (8.4)           |
|            | 3                 | 31.7 (CH)               | 2.08–2.00, m            |
|            | 4                 | 18.8 (CH <sub>3</sub> ) | 0.93, overlap           |
|            | 5                 | 19.9 (CH <sub>3</sub> ) | 0.91, overlap           |
| N-Me-L-Val | 1                 | 172.8 (qC)              |                         |
|            | 2                 | 59.8 (CH)               | 5.18, d (10.7)          |
|            | 3                 | 29.0 (CH)               | 2.36–2.27, m            |
|            | 4                 | 19.9 (CH <sub>3</sub> ) | 0.87, overlap           |
|            | 5                 | 18.9 (CH <sub>3</sub> ) | 0.81, d (6.7)           |
|            | N-CH <sub>3</sub> | 31.4 (CH <sub>3</sub> ) | 3.11, s                 |
| N-Me-L-Val | 1                 | 171.8 (qC)              |                         |
|            | 2                 | 63.8 (CH)               | 4.58, d (11.1)          |
|            | 3                 | 27.7 (CH)               | 2.25–2.13, m            |
|            | 4                 | 19.8 (CH <sub>3</sub> ) | 0.87, overlap           |
|            | 5                 | 19.0 (CH <sub>3</sub> ) | 0.74, d (6.7)           |
|            | N-CH <sub>3</sub> | 31.6                    | 3.03, s                 |
| PEA        | 1                 | 41.7 (CH <sub>2</sub> ) | 3.49–3.36, m            |
|            | 2                 | 36.7 (CH <sub>2</sub> ) | 2.77, t (7.2)           |
|            | 3                 | 140.4 (qC)              |                         |
|            | 4                 | 129.9 (CH)              | 7.19, overlap           |
|            | 5                 | 129.7 (CH)              | 7.26, overlap           |
|            | 6                 | 127.6 (CH)              | 7.19, overlap           |
|            | 7                 | 129.7 (CH)              | 7.26, overlap           |
|            | 8                 | 129.9 (CH)              | 7.19, overlap           |



**Table S6.**  $^1\text{H}$  (500 MHz) and  $^{13}\text{C}$  (125 MHz) NMR Data of **5** in Methanol- $d_4$  ( $\delta$  in ppm,  $J$  in Hz)

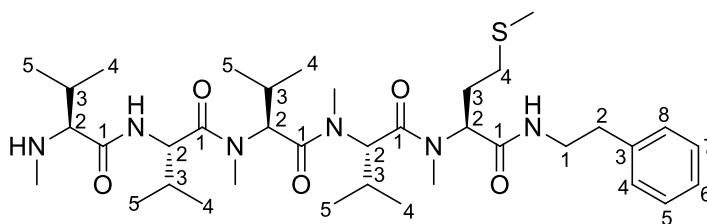

| subunit    | position          | $\delta_{\text{C}}$     | $\delta_{\text{H}}$     |
|------------|-------------------|-------------------------|-------------------------|
| N-Me-L-Val | 1                 | 168.0 (qC)              |                         |
|            | 2                 | 68.3 (CH)               | 3.68, d (5.3)           |
|            | 3                 | 31.7 (CH)               | 2.21–2.12, m            |
|            | 4                 | 18.7 (CH <sub>3</sub> ) | 1.05, d (7.0)           |
|            | 5                 | 18.5 (CH <sub>3</sub> ) | 1.02, d (6.9)           |
|            | N-CH <sub>3</sub> | 33.3 (CH <sub>3</sub> ) | 2.65, s                 |
| L-Val      | 1                 | 174.1 (qC)              |                         |
|            | 2                 | 56.7 (CH)               | 4.76, d (7.6)           |
|            | 3                 | 31.7 (CH)               | 2.11–2.03, m            |
|            | 4                 | 18.7 (CH <sub>3</sub> ) | 1.02, d (6.9)           |
|            | 5                 | 19.9 (CH <sub>3</sub> ) | 0.99, d (6.7)           |
| N-Me-L-Val | 1                 | 172.3 (qC)              |                         |
|            | 2                 | 59.8 (CH)               | 5.20, d (10.8)          |
|            | 3                 | 28.7 (CH)               | 2.37–2.25, m            |
|            | 4                 | 20.0 (CH <sub>3</sub> ) | 0.88, d (6.4)           |
|            | 5                 | 19.1 (CH <sub>3</sub> ) | 0.81, overlap           |
|            | N-CH <sub>3</sub> | 31.3 (CH <sub>3</sub> ) | 3.16, s                 |
| N-Me-L-Val | 1                 | 172.8 (qC)              |                         |
|            | 2                 | 59.9 (CH)               | 5.17, d (10.8)          |
|            | 3                 | 28.7 (CH)               | 2.37–2.25, m            |
|            | 4                 | 20.1 (CH <sub>3</sub> ) | 0.92, d (6.4)           |
|            | 5                 | 18.8 (CH <sub>3</sub> ) | 0.79, overlap           |
|            | N-CH <sub>3</sub> | 31.5 (CH <sub>3</sub> ) | 3.02, s                 |
| N-Me-L-Met | 1                 | 172.2 (qC)              |                         |
|            | 2                 | 57.5 (CH)               | 5.10, dd (9.8, 5.6)     |
|            | 3                 | 29.2 (CH <sub>2</sub> ) | 2.11–2.03, 1.96–1.80, m |
|            | 4                 | 31.5 (CH <sub>2</sub> ) | 2.37–2.25, m            |
|            | S-CH <sub>3</sub> | 15.4 (CH <sub>3</sub> ) | 2.06, s                 |
|            | N-CH <sub>3</sub> | 32.2 (CH <sub>3</sub> ) | 2.96, s                 |
|            |                   |                         |                         |
| PEA        | 1                 | 42.0 (CH <sub>2</sub> ) | 3.46–3.41, m            |
|            | 2                 | 36.6 (CH <sub>2</sub> ) | 2.79, dd (8.8, 5.5)     |
|            | 3                 | 140.5 (qC)              |                         |
|            | 4                 | 130.0 (CH)              | 7.20, overlap           |
|            | 5                 | 129.7 (CH)              | 7.28, overlap           |
|            | 6                 | 127.6 (CH)              | 7.20, overlap           |
|            | 7                 | 129.7 (CH)              | 7.28, overlap           |
|            | 8                 | 130.0 (CH)              | 7.20, overlap           |

**Table S7.**  $^1\text{H}$  (500 MHz) and  $^{13}\text{C}$  (125 MHz) NMR Data of **6** in Methanol- $d_4$  ( $\delta$  in ppm,  $J$  in Hz)

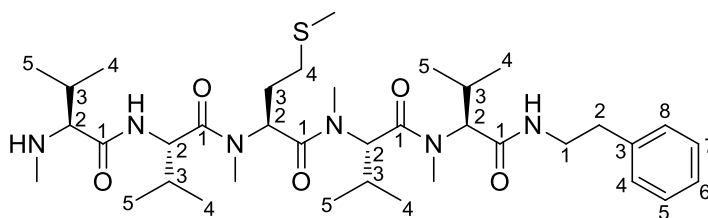

| subunit    | position          | $\delta_c$              | $\delta_H$              |
|------------|-------------------|-------------------------|-------------------------|
| N-Me-L-Val | 1                 | 169.1 (qC)              |                         |
|            | 2                 | 68.6 (CH)               | 3.55, d (5.6)           |
|            | 3                 | 31.9 (CH)               | 2.24–2.01, m            |
|            | 4                 | 19.0 (CH <sub>3</sub> ) | 1.04, overlap           |
|            | 5                 | 18.8 (CH <sub>3</sub> ) | 1.02, overlap           |
|            | N-CH <sub>3</sub> | 33.5 (CH <sub>3</sub> ) | 2.60, s                 |
|            |                   |                         |                         |
| L-Val      | 1                 | 174.0 (qC)              |                         |
|            | 2                 | 56.8 (CH)               | 4.70, d (8.0)           |
|            | 3                 | 31.6 (CH)               | 2.24–2.01, m            |
|            | 4                 | 18.8 (CH <sub>3</sub> ) | 1.02, overlap           |
|            | 5                 | 19.8 (CH <sub>3</sub> ) | 0.99, overlap           |
| N-Me-L-Met | 1                 | 172.6 (qC)              |                         |
|            | 2                 | 53.3 (CH)               | 5.76, t (7.3)           |
|            | 3                 | 29.2 (CH <sub>2</sub> ) | 2.24–2.01, 1.93–1.84, m |
|            | 4                 | 31.3 (CH <sub>2</sub> ) | 2.47–2.36, m            |
|            | S-CH <sub>3</sub> | 15.2 (CH <sub>3</sub> ) | 2.03, s                 |
|            | N-CH <sub>3</sub> | 31.8 (CH <sub>3</sub> ) | 3.17, s                 |
| N-Me-L-Val | 1                 | 172.5 (qC)              |                         |
|            | 2                 | 60.1 (CH)               | 5.10, d (10.7)          |
|            | 3                 | 28.7 (CH)               | 2.36–2.27, m            |
|            | 4                 | 20.1 (CH <sub>3</sub> ) | 0.89, d (6.4)           |
|            | 5                 | 18.9 (CH <sub>3</sub> ) | 0.80, d (6.8)           |
|            | N-CH <sub>3</sub> | 31.1 (CH <sub>3</sub> ) | 3.01, s                 |
| N-Me-L-Val | 1                 | 171.8 (qC)              |                         |
|            | 2                 | 63.9 (CH)               | 4.57, d (11.1)          |
|            | 3                 | 27.8 (CH)               | 2.24–2.01, m            |
|            | 4                 | 19.9 (CH <sub>3</sub> ) | 0.86, d (6.5)           |
|            | 5                 | 19.2 (CH <sub>3</sub> ) | 0.76, d (6.6)           |
|            | N-CH <sub>3</sub> | 31.5 (CH <sub>3</sub> ) | 2.99, s                 |
| PEA        | 1                 | 41.7 (CH <sub>2</sub> ) | 3.51–3.35, m            |
|            | 2                 | 36.7 (CH <sub>2</sub> ) | 2.80–2.72, m            |
|            | 3                 | 140.4 (qC)              |                         |
|            | 4                 | 129.9 (CH)              | 7.19, overlap           |
|            | 5                 | 129.7 (CH)              | 7.26, overlap           |
|            | 6                 | 127.6 (CH)              | 7.19, overlap           |
|            | 7                 | 129.7 (CH)              | 7.26, overlap           |
|            | 8                 | 129.9 (CH)              | 7.19, overlap           |

**Table S8.**  $^1\text{H}$  (500 MHz) and  $^{13}\text{C}$  (125 MHz) NMR Data of **7** in Methanol- $d_4$  ( $\delta$  in ppm,  $J$  in Hz)

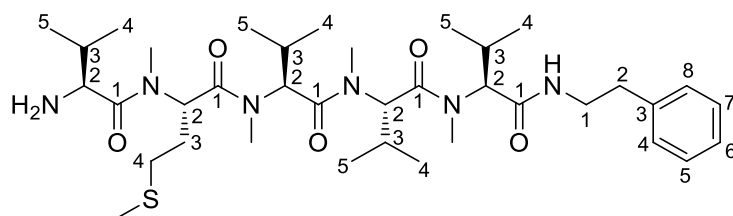

| subunit    | position          | $\delta_c$              | $\delta_H$              |
|------------|-------------------|-------------------------|-------------------------|
| L-Val      | 1                 | 171.1 (qC)              |                         |
|            | 2                 | 57.1 (CH)               | 4.26, d (4.5)           |
|            | 3                 | 30.9 (CH)               | 2.24–2.04, m            |
|            | 4                 | 19.6 (CH <sub>3</sub> ) | 1.11, d (7.0)           |
|            | 5                 | 16.9 (CH <sub>3</sub> ) | 0.99, d (6.9)           |
| N-Me-L-Met | 1                 | 172.7 (C)               |                         |
|            | 2                 | 53.7 (CH)               | 5.74, t (7.3)           |
|            | 3                 | 28.9 (CH <sub>2</sub> ) | 2.24–2.04, 2.02–1.93, m |
|            | 4                 | 31.4 (CH <sub>2</sub> ) | 2.55–2.42, m            |
|            | S-CH <sub>3</sub> | 15.2 (CH <sub>3</sub> ) | 2.08, s                 |
|            | N-CH <sub>3</sub> | 31.7 (CH <sub>3</sub> ) | 3.09, s                 |
| N-Me-L-Val | 1                 | 172.0 (qC)              |                         |
|            | 2                 | 60.1 (CH)               | 5.12, d (10.8)          |
|            | 3                 | 28.5 (CH)               | 2.37–2.27, m            |
|            | 4                 | 20.0 (CH <sub>3</sub> ) | 0.88, overlap           |
|            | 5                 | 18.9 (CH <sub>3</sub> ) | 0.79, overlap           |
|            | N-CH <sub>3</sub> | 31.0 (CH <sub>3</sub> ) | 3.05, s                 |
| N-Me-L-Val | 1                 | 172.6 (qC)              |                         |
|            | 2                 | 59.9 (CH)               | 5.15, d (10.8)          |
|            | 3                 | 28.9 (CH)               | 2.37–2.27, m            |
|            | 4                 | 20.0 (CH <sub>3</sub> ) | 0.88, overlap           |
|            | 5                 | 18.9 (CH <sub>3</sub> ) | 0.79, overlap           |
|            | N-CH <sub>3</sub> | 31.3 (CH <sub>3</sub> ) | 2.99, s                 |
| N-Me-L-Val | 1                 | 171.8 (C)               |                         |
|            | 2                 | 63.8 (CH)               | 4.57, d (11.1)          |
|            | 3                 | 27.7 (CH)               | 2.24–2.04, m            |
|            | 4                 | 19.9 (CH <sub>3</sub> ) | 0.86, overlap           |
|            | 5                 | 18.9 (CH <sub>3</sub> ) | 0.73, d (6.7)           |
|            | N-CH <sub>3</sub> | 31.6 (CH <sub>3</sub> ) | 3.02, s                 |
| PEA        | 1                 | 41.7 (CH <sub>2</sub> ) | 3.50–3.35, m            |
|            | 2                 | 36.7 (CH <sub>2</sub> ) | 2.80–2.72, m            |
|            | 3                 | 140.4 (qC)              |                         |
|            | 4                 | 129.9 (CH)              | 7.19, overlap           |
|            | 5                 | 129.7 (CH)              | 7.26, overlap           |
|            | 6                 | 127.6 (CH)              | 7.19, overlap           |
|            | 7                 | 129.7 (CH)              | 7.26, overlap           |
|            | 8                 | 129.9 (CH)              | 7.19, overlap           |

**Table S9.**  $^1\text{H}$  (500 MHz) and  $^{13}\text{C}$  (125 MHz) NMR Data of **10** in Methanol- $d_4$  ( $\delta$  in ppm,  $J$  in Hz)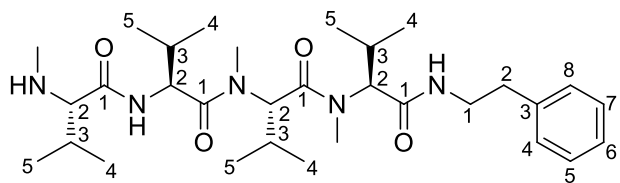

| subunit    | position          | $\delta_{\text{C}}$     | $\delta_{\text{H}}$ |
|------------|-------------------|-------------------------|---------------------|
| N-Me-L-Val | 1                 | 168.8 (qC)              |                     |
|            | 2                 | 68.6 (CH)               | 3.58, d (5.4)       |
|            | 3                 | 31.8 (CH)               | 2.16–2.09, m        |
|            | 4                 | 18.8 (CH <sub>3</sub> ) | 1.03, d (6.5)       |
|            | 5                 | 18.7 (CH <sub>3</sub> ) | 1.00, overlap       |
|            | N-CH <sub>3</sub> | 33.5 (CH <sub>3</sub> ) | 2.60, s             |
| L-Val      | 1                 | 174.2 (qC)              |                     |
|            | 2                 | 56.6 (CH)               | 4.73, d (7.9)       |
|            | 3                 | 31.8 (CH)               | 2.09–2.02, m        |
|            | 4                 | 18.8 (CH <sub>3</sub> ) | 1.00, overlap       |
|            | 5                 | 19.8 (CH <sub>3</sub> ) | 0.95, d (6.8)       |
| N-Me-L-Val | 1                 | 172.9 (qC)              |                     |
|            | 2                 | 59.6 (CH)               | 5.19, d (10.8)      |
|            | 3                 | 28.9 (CH)               | 2.35–2.27, m        |
|            | 4                 | 19.8 (CH <sub>3</sub> ) | 0.86, d (5.9)       |
|            | 5                 | 19.2 (CH <sub>3</sub> ) | 0.80, d (6.7)       |
|            | N-CH <sub>3</sub> | 31.4 (CH <sub>3</sub> ) | 3.15, s             |
| N-Me-L-Val | 1                 | 171.8 (qC)              |                     |
|            | 2                 | 63.8 (CH)               | 4.58, d (11.1)      |
|            | 3                 | 27.7 (CH)               | 2.24–2.16, m        |
|            | 4                 | 19.8 (CH <sub>3</sub> ) | 0.86, d (5.9)       |
|            | 5                 | 19.0 (CH <sub>3</sub> ) | 0.74, d (6.7)       |
|            | N-CH <sub>3</sub> | 31.7 (CH <sub>3</sub> ) | 3.05, s             |
| PEA        | 1                 | 41.7 (CH <sub>2</sub> ) | 3.48–3.35, m        |
|            | 2                 | 36.7 (CH <sub>2</sub> ) | 2.76, t (7.3)       |
|            | 3                 | 140.4 (qC)              |                     |
|            | 4                 | 129.9 (CH)              | 7.19, overlap       |
|            | 5                 | 129.7 (CH)              | 7.26, overlap       |
|            | 6                 | 127.6 (CH)              | 7.19, overlap       |
|            | 7                 | 129.7 (CH)              | 7.26, overlap       |
|            | 8                 | 129.9 (CH)              | 7.19, overlap       |

**Table S10.**  $^1\text{H}$  (500 MHz) and  $^{13}\text{C}$  (125 MHz) NMR Data of **12** in Methanol- $d_4$  ( $\delta$  in ppm,  $J$  in Hz)

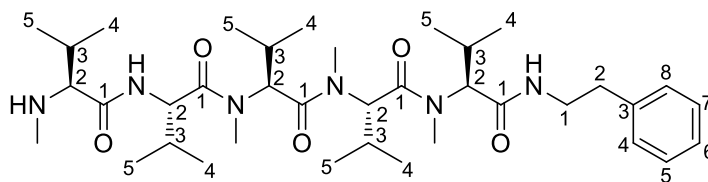

| subunit    | position          | $\delta_{\text{C}}$     | $\delta_{\text{H}}$ |
|------------|-------------------|-------------------------|---------------------|
| N-Me-L-Val | 1                 | 168.6 (qC)              |                     |
|            | 2                 | 68.5 (CH)               | 3.61, d (5.3)       |
|            | 3                 | 31.8 (CH)               | 2.24–2.12, m        |
|            | 4                 | 18.7 (CH <sub>3</sub> ) | 1.01, overlap       |
|            | 5                 | 18.6 (CH <sub>3</sub> ) | 1.01, overlap       |
|            | N-CH <sub>3</sub> | 33.5 (CH <sub>3</sub> ) | 2.61, s             |
| L-Val      | 1                 | 174.2 (qC)              |                     |
|            | 2                 | 56.6 (CH)               | 4.76, d (7.7)       |
|            | 3                 | 31.7 (CH)               | 2.11–2.03, m        |
|            | 4                 | 18.8 (CH <sub>3</sub> ) | 1.01, overlap       |
|            | 5                 | 20.0 (CH <sub>3</sub> ) | 0.98, overlap       |
| N-Me-L-Val | 1                 | 172.4 (qC)              |                     |
|            | 2                 | 59.8 (CH)               | 5.20, d (10.8)      |
|            | 3                 | 28.7 (CH)               | 2.37–2.26, m        |
|            | 4                 | 19.9 (CH <sub>3</sub> ) | 0.86, overlap       |
|            | 5                 | 19.0 (CH <sub>3</sub> ) | 0.78, overlap       |
|            | N-CH <sub>3</sub> | 31.3 (CH <sub>3</sub> ) | 3.15, s             |
| N-Me-L-Val | 1                 | 172.7 (qC)              |                     |
|            | 2                 | 59.7 (CH)               | 5.18, d (10.8)      |
|            | 3                 | 28.9 (CH)               | 2.37–2.26, m        |
|            | 4                 | 19.9 (CH <sub>3</sub> ) | 0.86, overlap       |
|            | 5                 | 19.0 (CH <sub>3</sub> ) | 0.78, overlap       |
|            | N-CH <sub>3</sub> | 31.5 (CH <sub>3</sub> ) | 3.04, s             |
| N-Me-L-Val | 1                 | 171.8 (qC)              |                     |
|            | 2                 | 63.8 (CH)               | 4.57, d (11.1)      |
|            | 3                 | 27.7 (CH)               | 2.24–2.12, m        |
|            | 4                 | 19.9 (CH <sub>3</sub> ) | 0.86, overlap       |
|            | 5                 | 19.1 (CH <sub>3</sub> ) | 0.74, d (6.66)      |
|            | N-CH <sub>3</sub> | 31.6 (CH <sub>3</sub> ) | 3.04, s             |
| PEA        | 1                 | 41.7 (CH <sub>2</sub> ) | 3.49–3.35, m        |
|            | 2                 | 36.7 (CH <sub>2</sub> ) | 2.76, m             |
|            | 3                 | 140.4 (qC)              |                     |
|            | 4                 | 129.9 (CH)              | 7.19, overlap       |
|            | 5                 | 129.7 (CH)              | 7.26, overlap       |
|            | 6                 | 127.6 (CH)              | 7.19, overlap       |
|            | 7                 | 129.7 (CH)              | 7.26, overlap       |
|            | 8                 | 129.9 (CH)              | 7.19, overlap       |

**Table S11.** Bacterial strains used in this study

| strain                    | relevant Genotype                                                                                                                                                                                                                                | reference      |
|---------------------------|--------------------------------------------------------------------------------------------------------------------------------------------------------------------------------------------------------------------------------------------------|----------------|
| <i>E. coli</i> DH10B MtaA | F– mcrA, $\Delta(mrr-hsdRMS-mcrBC)$ , $\Phi80lacZ\Delta M15$ , $\Delta lacX74$ , <i>recA1</i> , <i>endA1</i> , <i>araD139</i> , $\Delta(ara\ leu)7697$ , <i>galU</i> , <i>galK</i> , <i>rpsL</i> , <i>nupG</i> , $\lambda^-$ , <i>entD::mtaA</i> | <sup>3,4</sup> |
| <i>Xenorhabdus</i> KJ12.1 | wild type                                                                                                                                                                                                                                        | <sup>3</sup>   |

**Table S12.** Plasmids used in this study

| plasmid        | description                                                                                                                         | reference    |
|----------------|-------------------------------------------------------------------------------------------------------------------------------------|--------------|
| pCOLA-ara-tacI | 3,345 bp, modified from pCOLA_tacI/I that contains arabinose-inducible promotor and kanamycin resistance gene (Km <sup>R</sup> )    | <sup>3</sup> |
| pCDF-ara-tacI  | 3,404 bp, modified from pCDF_tacI/I that contains arabinose-inducible promoter and spectinomycin resistance gene (Sm <sup>R</sup> ) | <sup>3</sup> |
| pCX3           | 16,107 bp, <i>kj12ABC</i> gene cluster from <i>Xenorhabdus</i> KJ12.1 genomic DNA assembled into pCOLA-ara-tacI, Km <sup>R</sup>    | <sup>3</sup> |
| pLZ59          | 3566 bp, <i>MbtH</i> gene from <i>Xenorhabdus</i> KJ12.1 genomic DNA assembled into pCDF-ara-tacI, Sm <sup>R</sup>                  | this work    |
| pLZ60          | 3566 bp, <i>MbtH</i> gene from <i>E. coli</i> DH10B MtaA genomic DNA assembled into pCDF-ara-tacI, Sm <sup>R</sup>                  | this work    |

**Table S13.** Primers used in this study

| primer   | sequence (5'-3')                                            | targeting DNA fragment                              | plasmid |
|----------|-------------------------------------------------------------|-----------------------------------------------------|---------|
| XC252-Fw | AATTCCATGGAACAATTAACCGGAAATG                                | <i>MbtH</i> from <i>Xenorhabdus</i> KJ12.1 (218 bp) | pLZ59   |
| XC252-Rv | ATGATTAATTGTTAGTGCATATCAGTCTGCT<br>TTTTAG                   |                                                     |         |
| XC253-Fw | AGACTGATATGCACTAACAATTAATCATCG<br>GCTCGTATAATG              | pCDF-ara-tacI vector<br>backbone (3,403 bp)         |         |
| XC253-Fw | ATTTCCGGTTAATTGTTCCATGGAATTCCTC<br>CTGTTAGC                 |                                                     |         |
| LZ_160   | ATGGCATTTCAGTAATCCCTTCGATG                                  | <i>MbtH</i> from <i>E. coli</i> DH10B MtaA (219 bp) | pLZ60   |
| LZ_161   | TCATTGTGCCTCCTGCAACTG                                       |                                                     |         |
| LZ_162   | AATTTTACCCAGTTGCAGGAGGCACAATGA<br>CAATTAATCATCGGCTCGTATAATG | pCDF-ara-tacI vector<br>backbone (3,427 bp)         |         |
| LZ_163   | TGCGGATCATCGAAGGGATTACTGAATGCC<br>ATGGAATTCCTCCTGTTAGCCC    |                                                     |         |

## Supplementary Figures

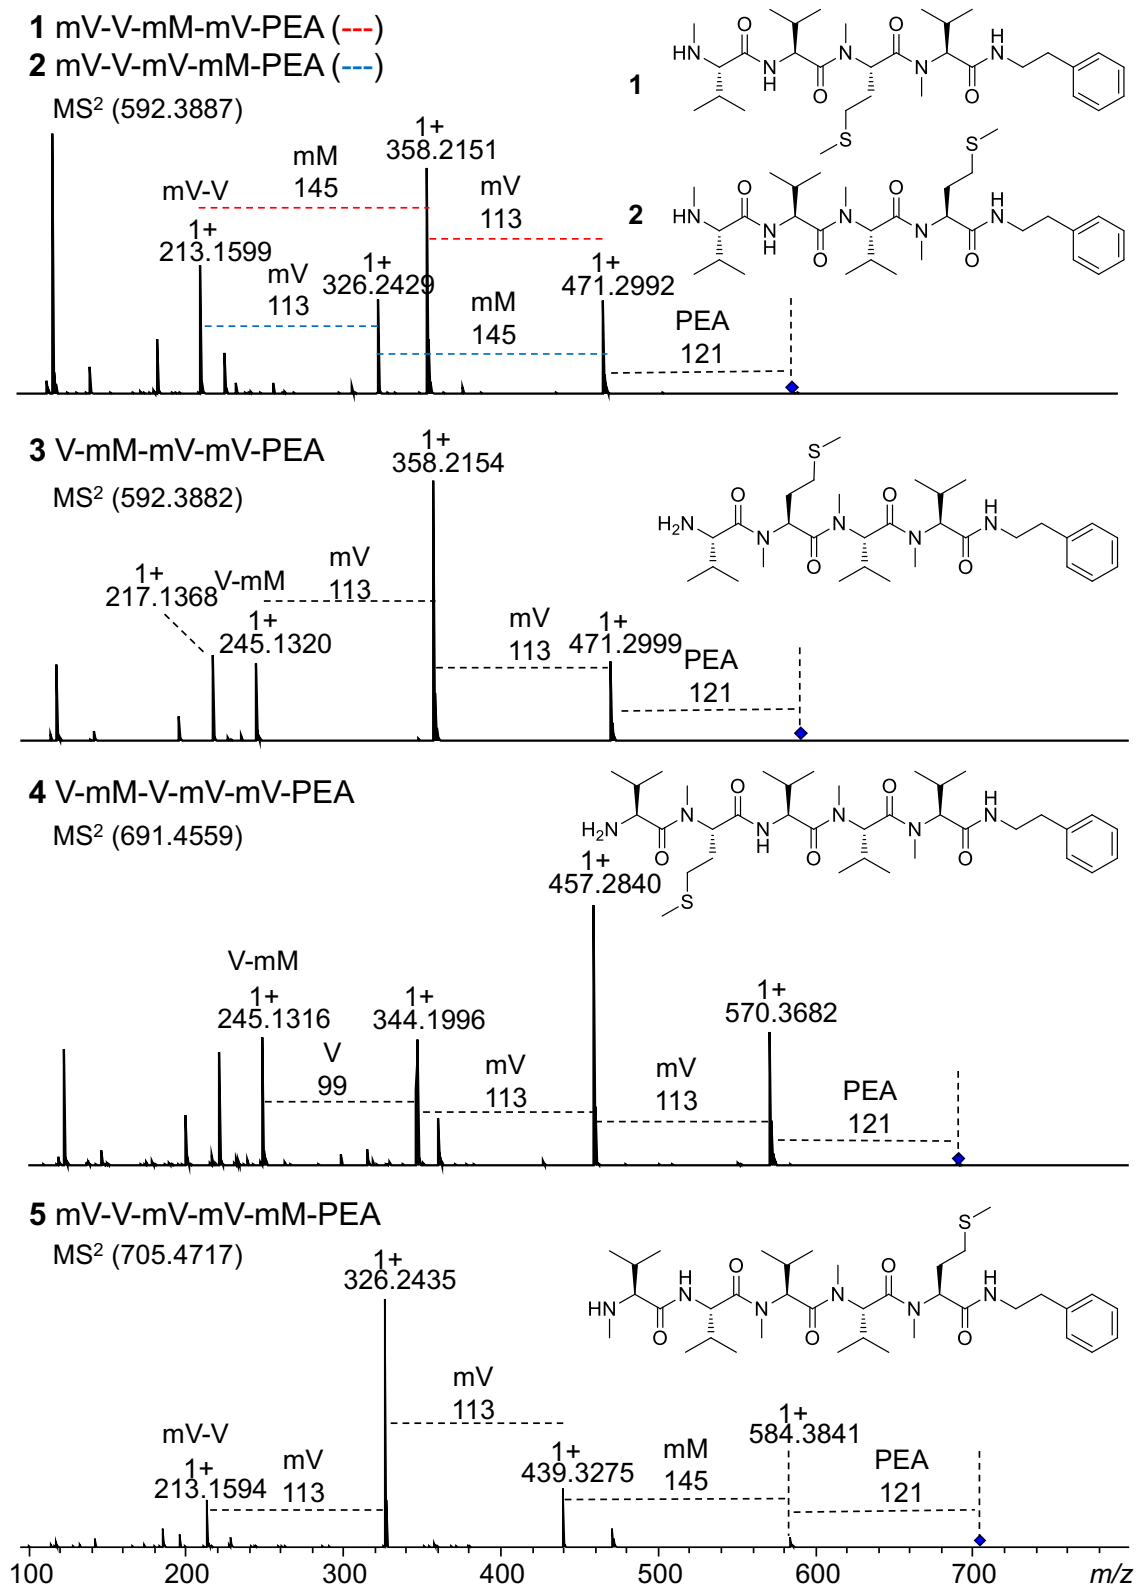

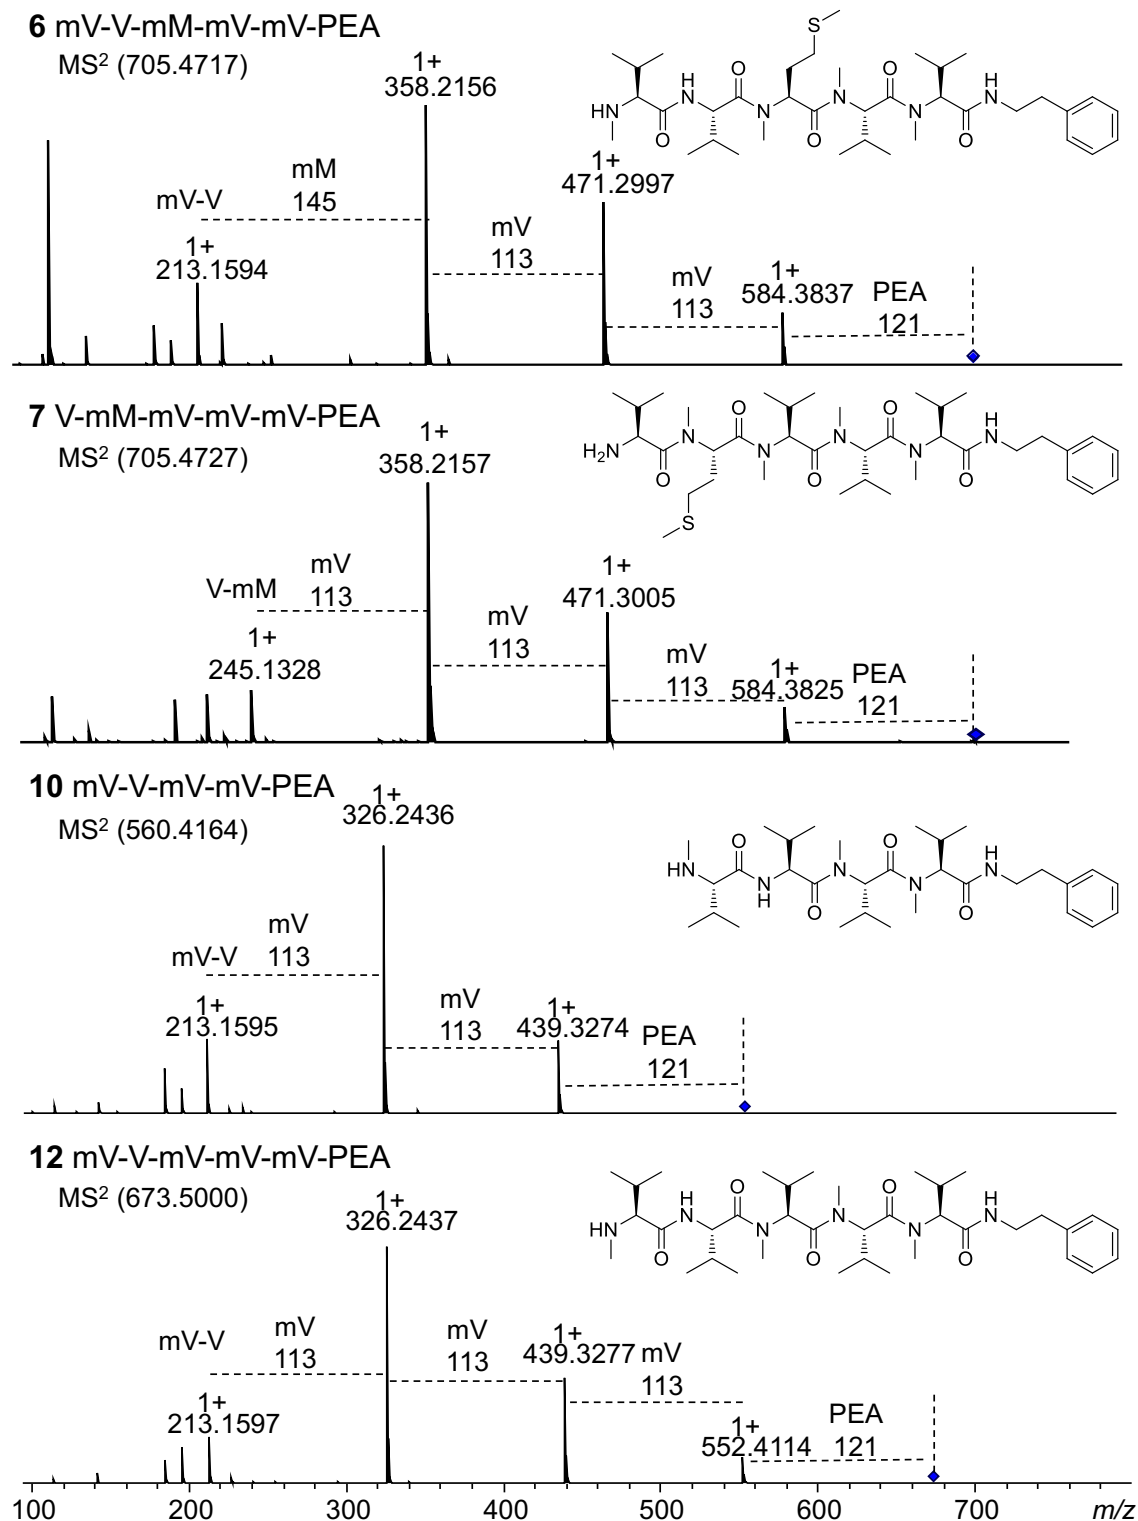

**Figure S1.** MS<sup>2</sup> fragmentation patterns of natural **1–7**, **10** and **12**.



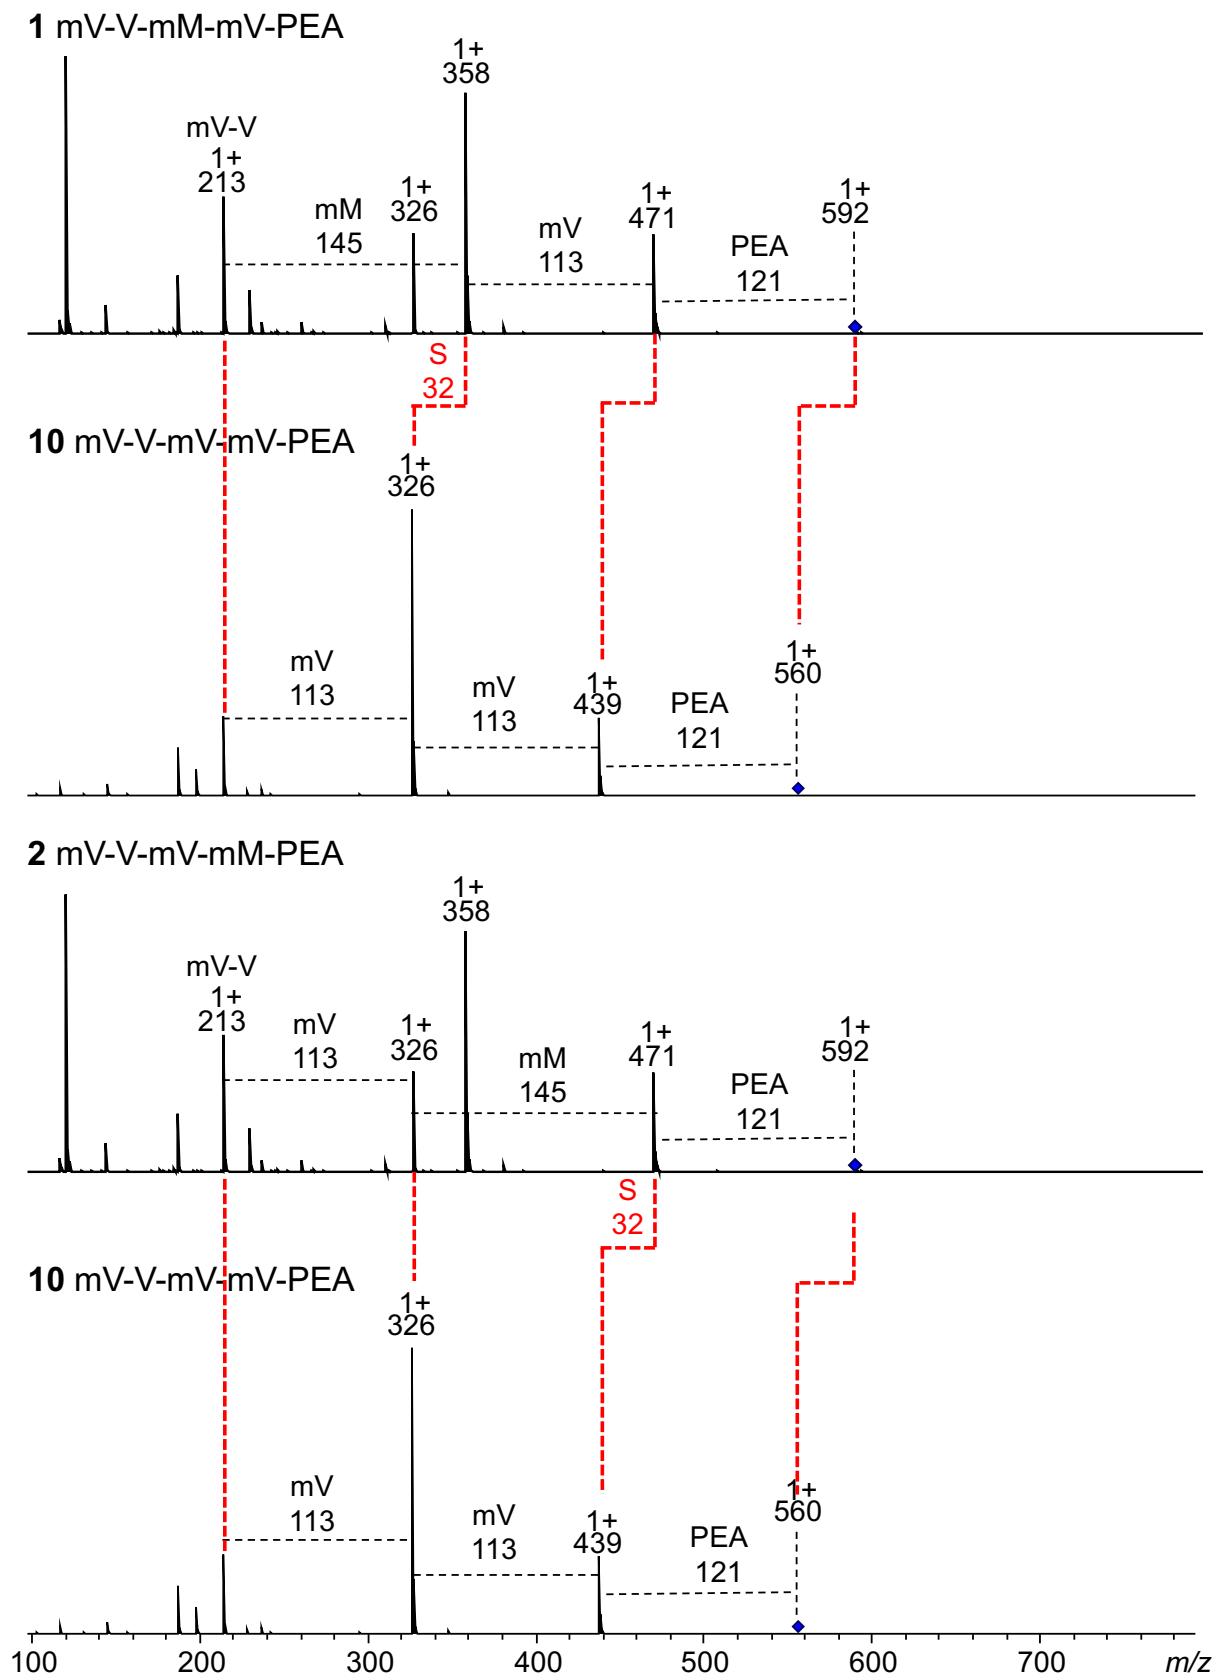

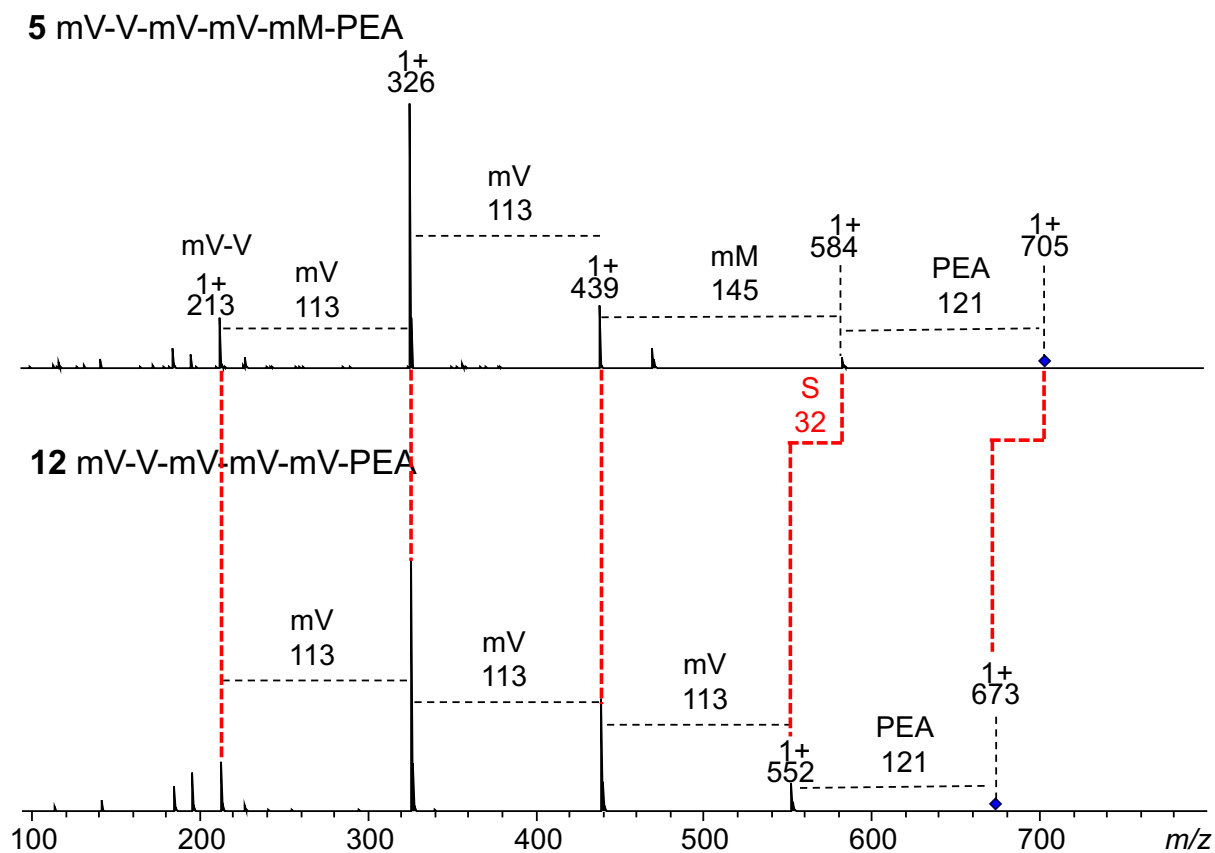

**Figure S2.** Comparative MS<sup>2</sup> fragmentation patterns of methionine-containing compounds **1**, **2** and **5** with corresponding valine-substituted compounds **10** and **12**.

**a**  $m/z$   $[M + H]^+$  592

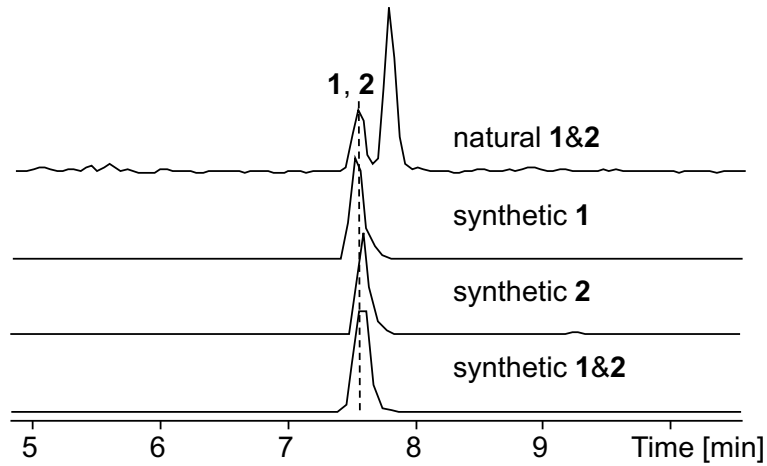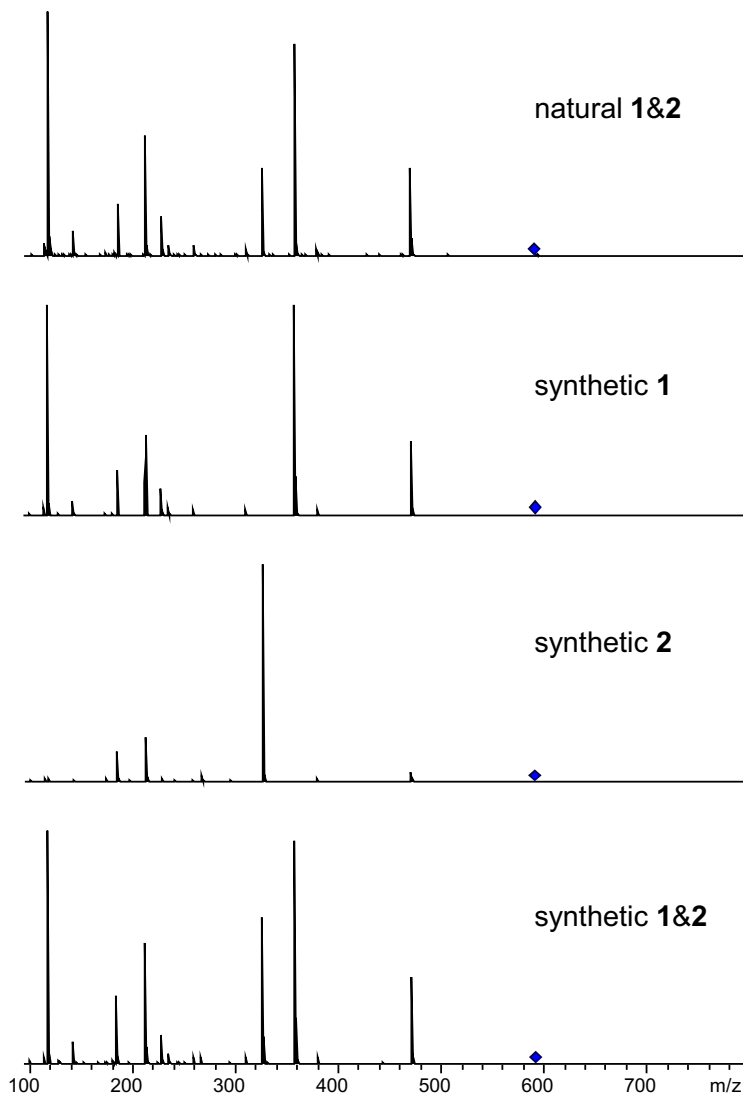

**b**  $m/z$   $[M + H]^+$  592

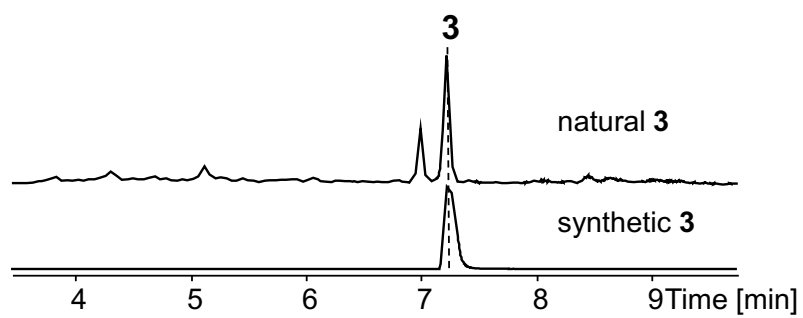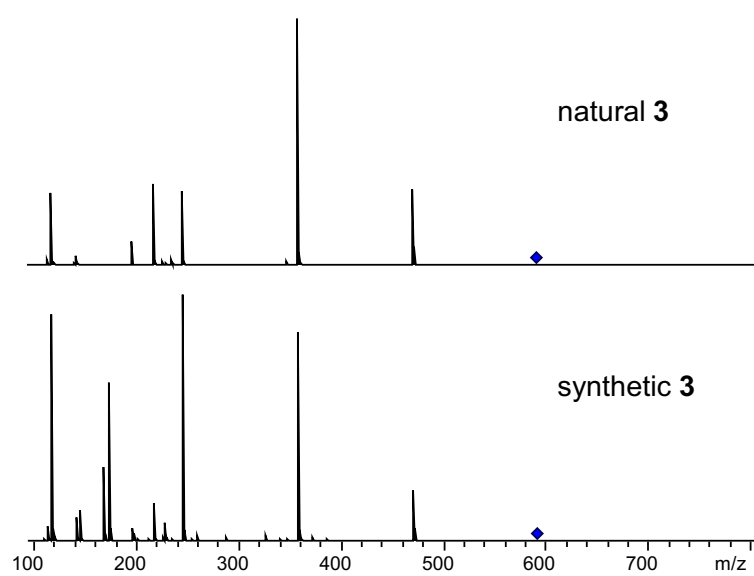

**c**  $m/z$   $[M + H]^+$  691

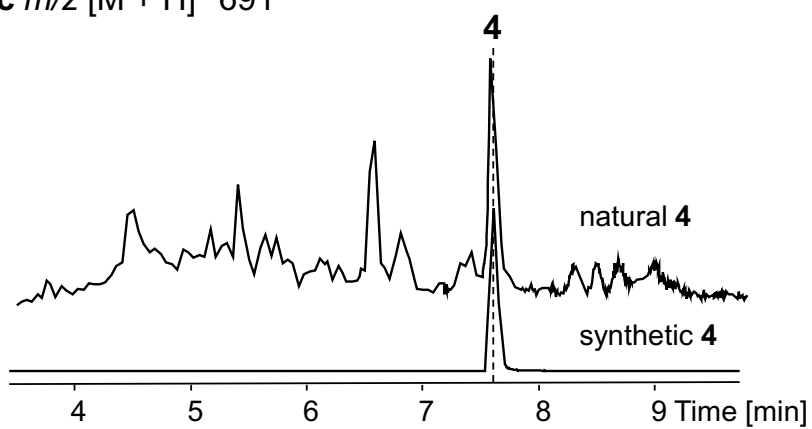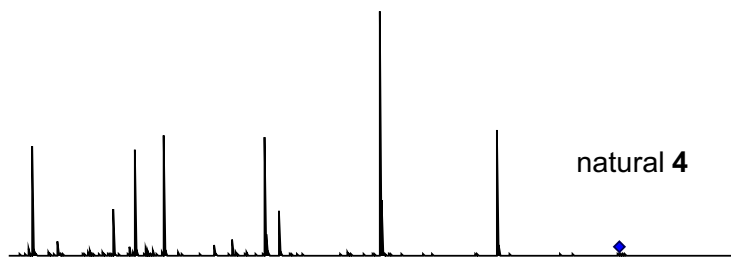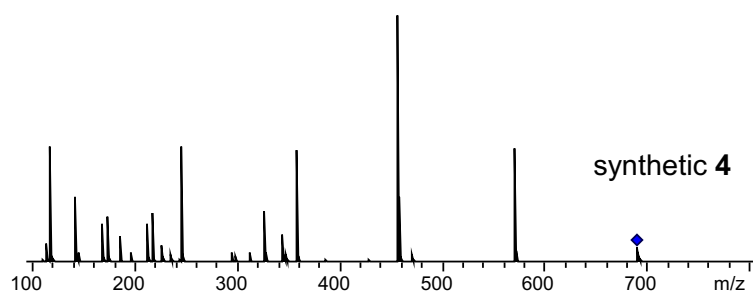

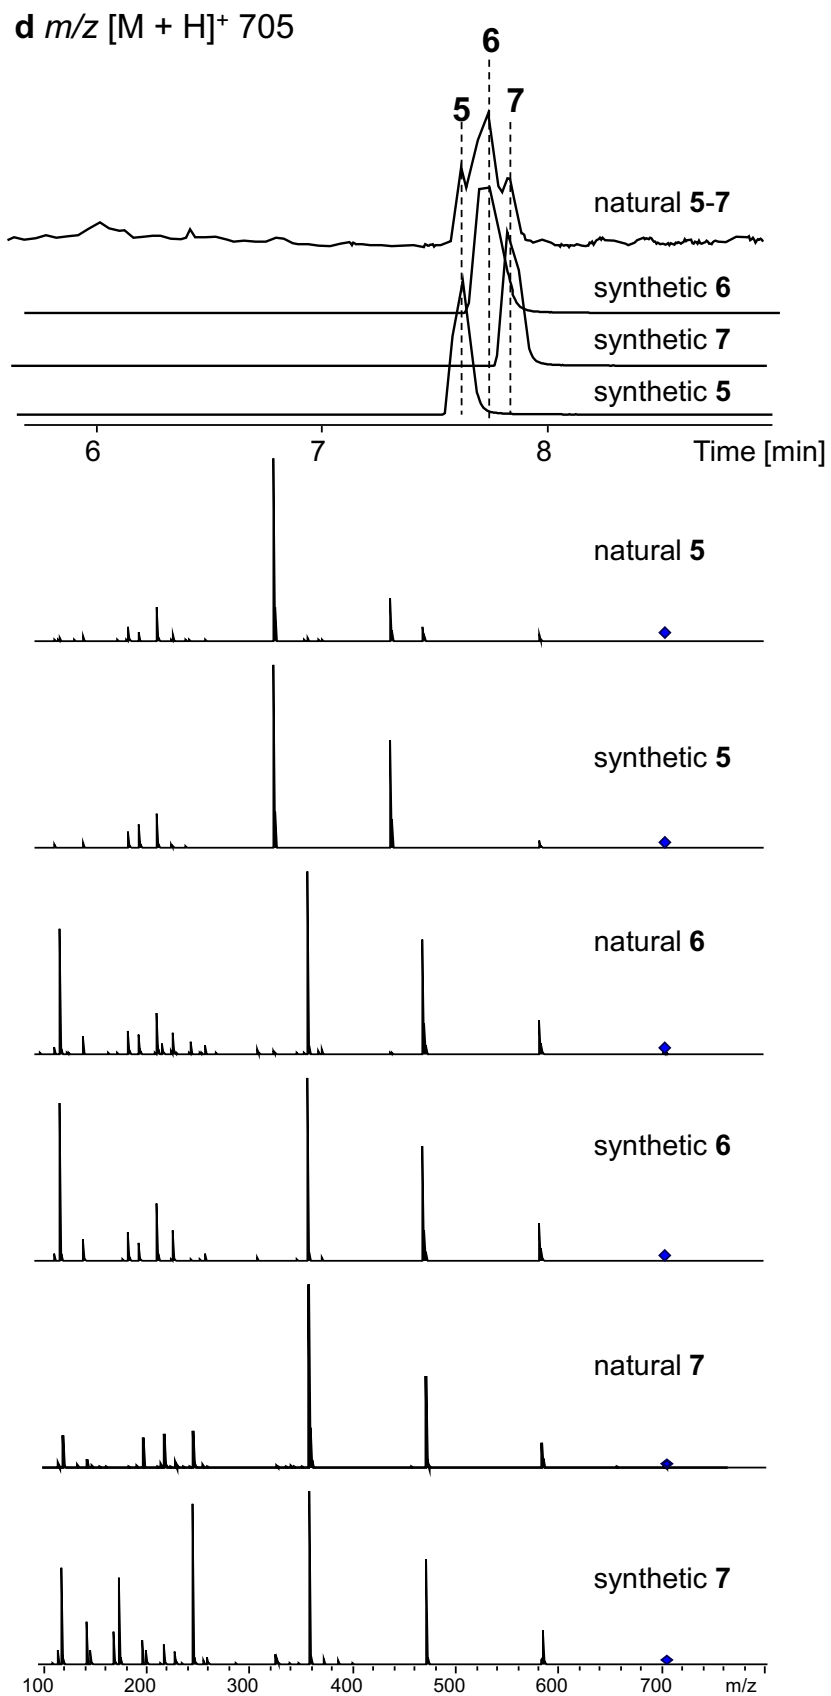

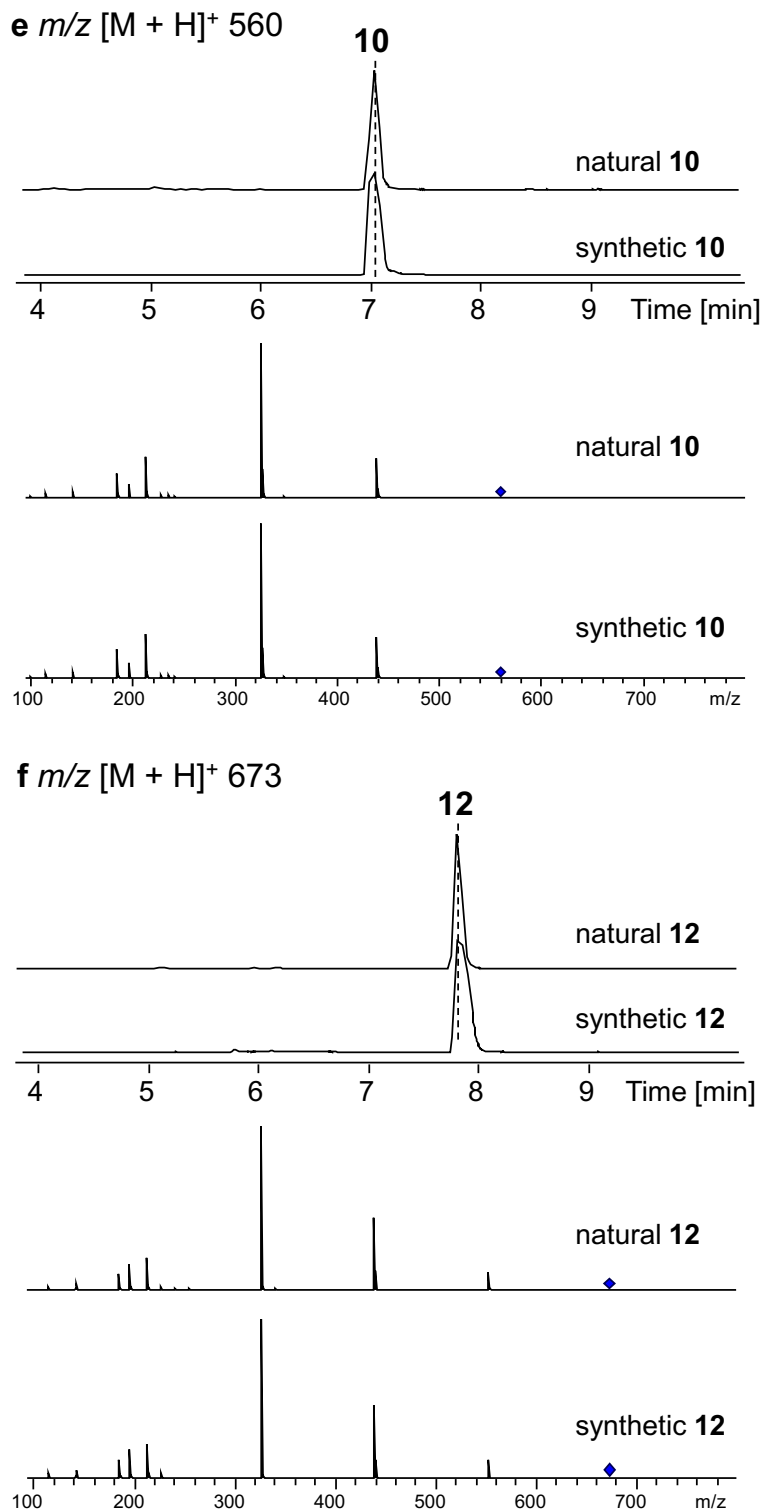

**Figure S3.** Extracted ion chromatograms (EICs) and the corresponding MS<sup>2</sup> fragmentation patterns of natural and synthetic **1**–**7**, **10** and **12** by HPLC-HR-MS/MS analysis. (a)  $m/z$   $[M + H]^+$  592 for compounds **1** and **2** (EIC from HPLC-ESI-MS analysis). (b)  $m/z$   $[M + H]^+$  592 for compound **3**; (c)  $m/z$   $[M + H]^+$  691 for compound **4**; (d)  $m/z$   $[M + H]^+$  705 for compounds **5**–**7**; (e)  $m/z$   $[M + H]^+$  560 for compound **10**; (f)  $m/z$   $[M + H]^+$  673 for compound **12**.

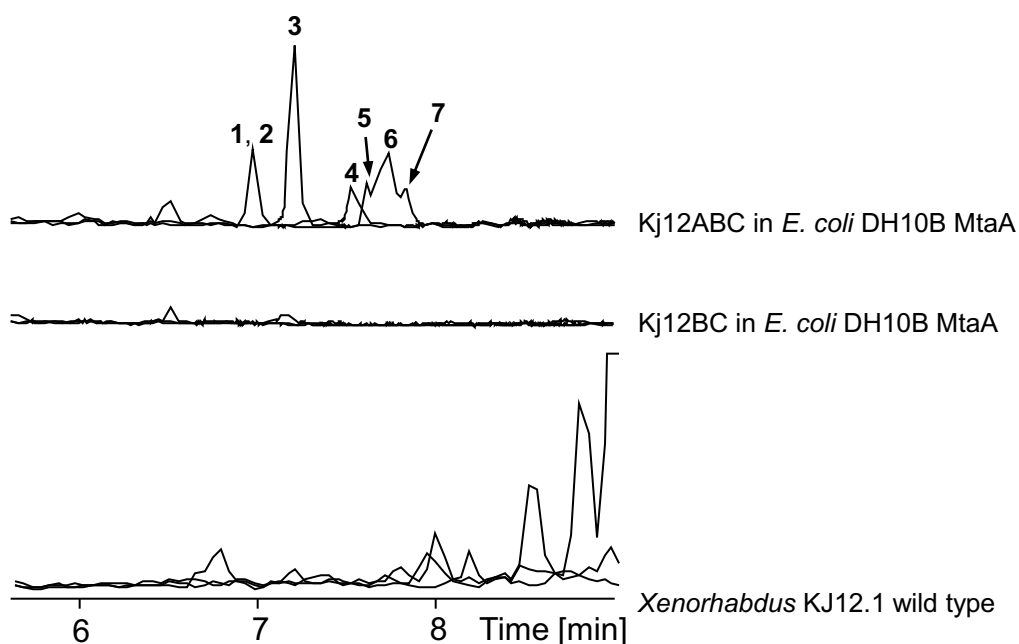

**Figure S4.** Extracted ion chromatograms (EICs) for methionine-containing rhabdopeptide/xenortide-like peptides (1–7) produced from the expression of Kj12ABC and Kj12BC in *E. coli* DH10B MtaA and wild type strains by HPLC-HR-MS analysis.



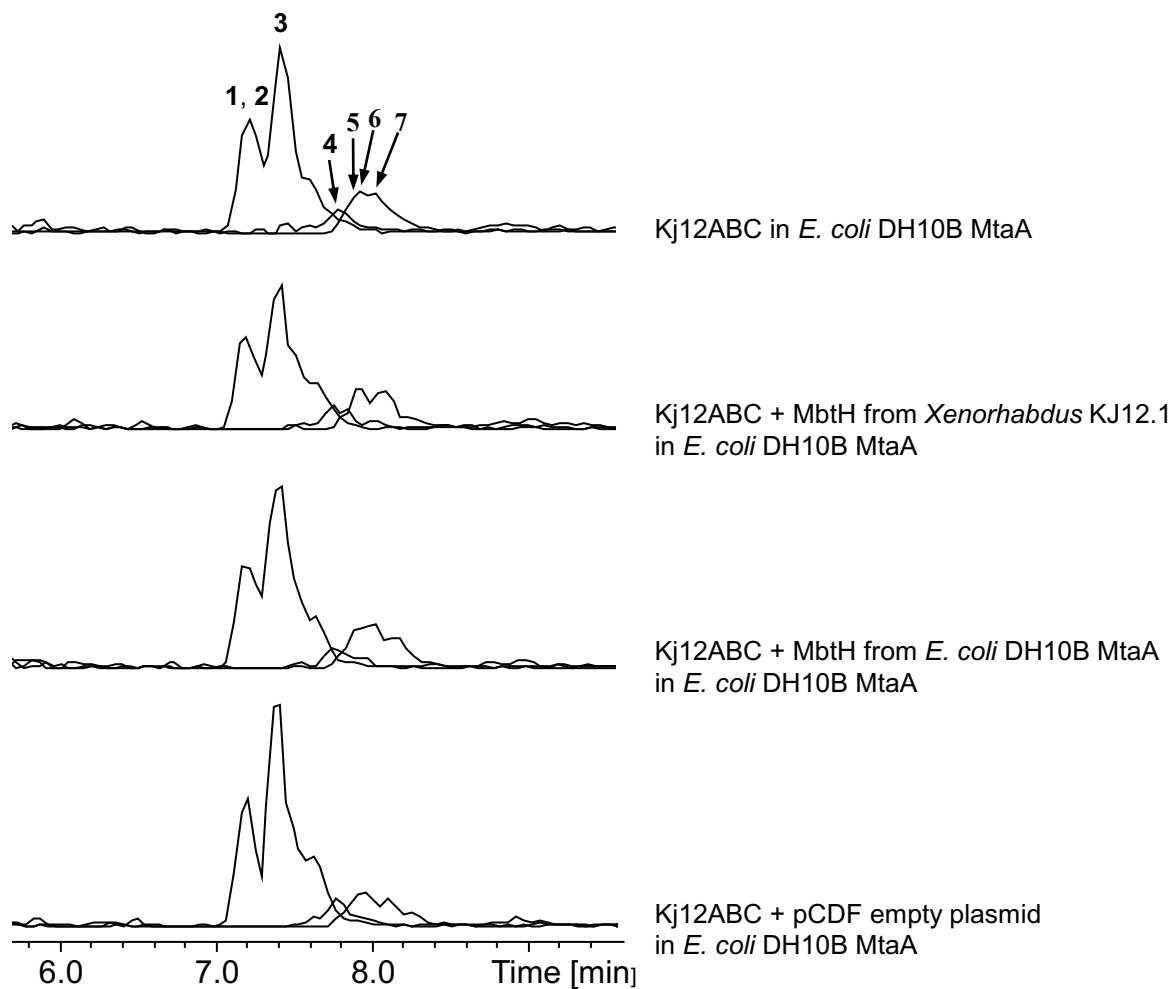

**Figure S5.** Extracted ion chromatograms (EICs) for methionine-containing rhabdopeptide/xenortide-like peptides (**1–7**) produced from the overexpression of *mbtH* of *Xenorhabdus* KJ12.1 and *E. coli* DH10B MtaA in *E. coli* DH10B MtaA strain by HPLC-ESI-MS analysis. All chromatograms were drawn to the same scale.

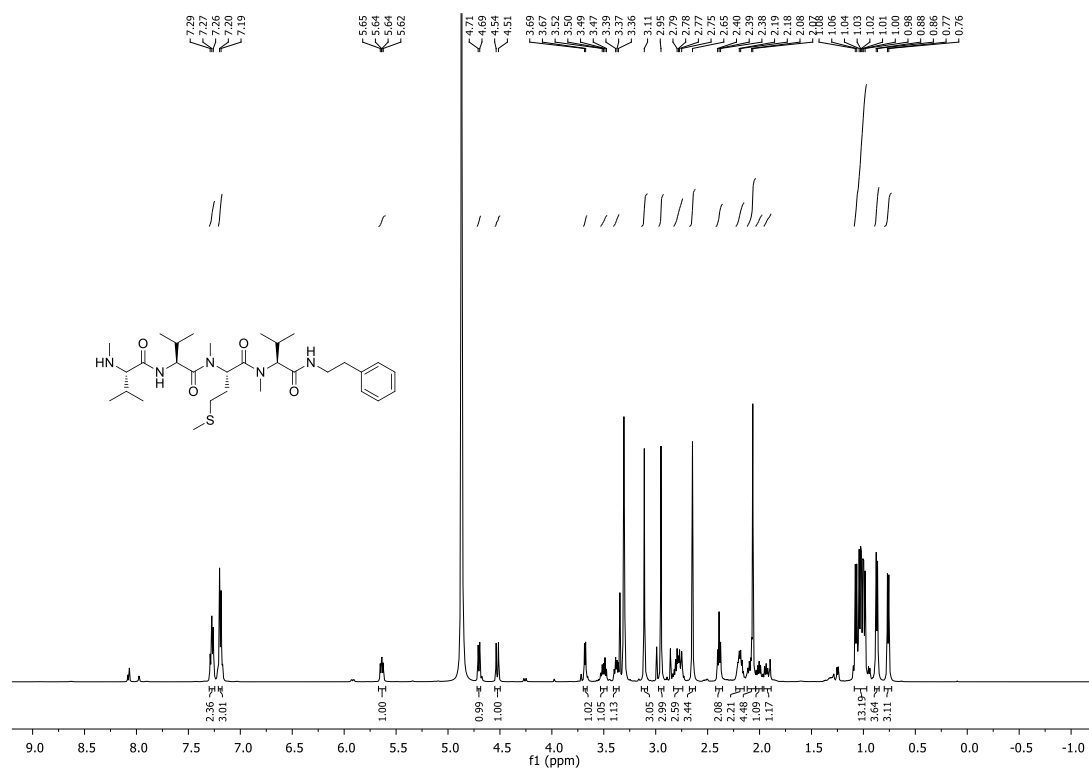

Figure S6. <sup>1</sup>H NMR (500 MHz, methanol-*d*<sub>4</sub>) spectrum of 1

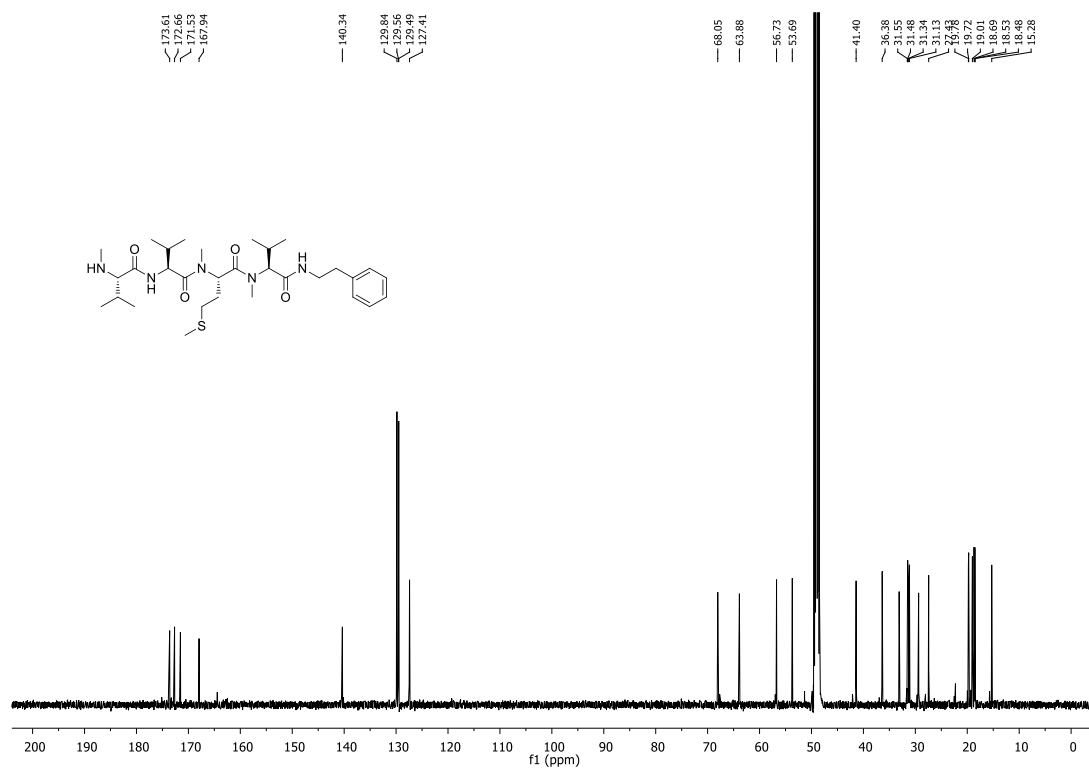

Figure S7. <sup>13</sup>C NMR (125 MHz, methanol-*d*<sub>4</sub>) spectrum of 1

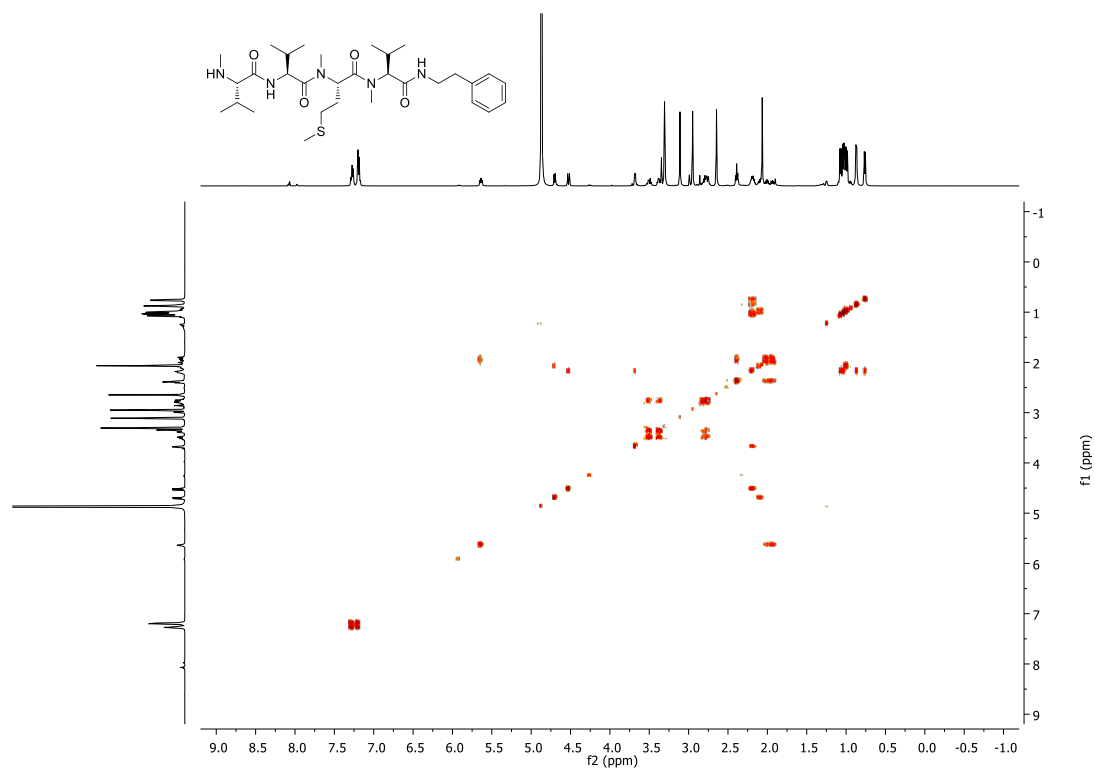

**Figure S8.** COSY (methanol- $d_4$ ) spectrum of **1**

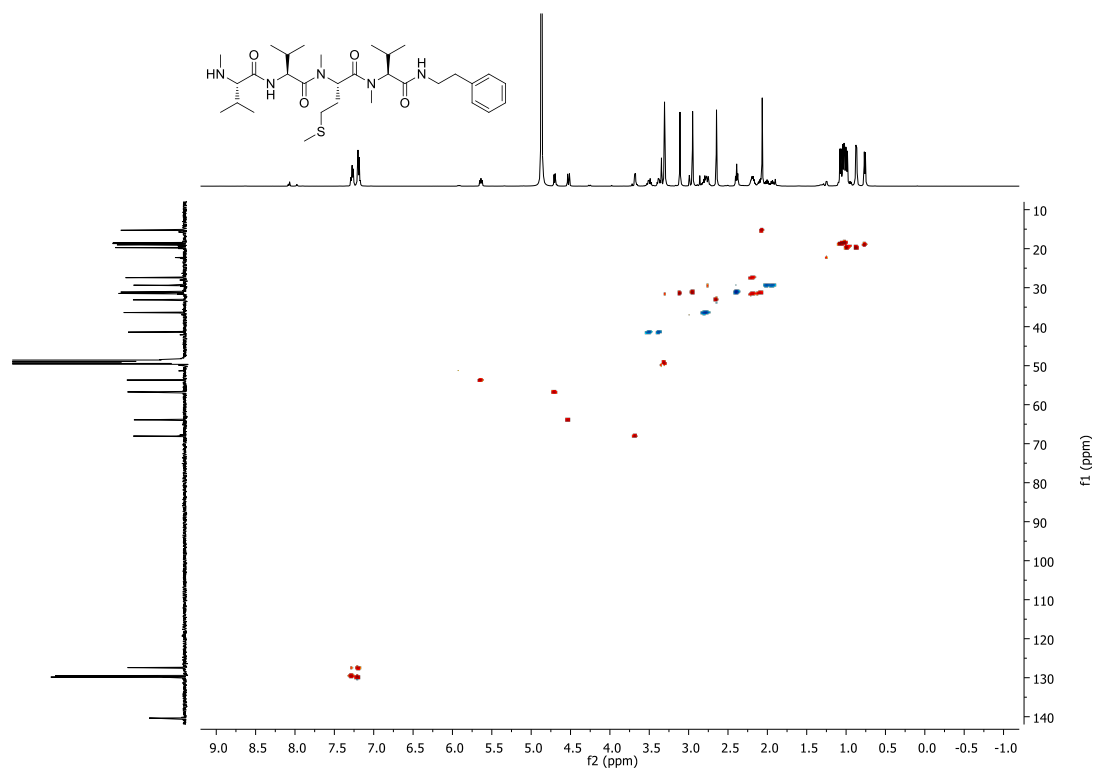

**Figure S9.** HSQC (methanol- $d_4$ ) spectrum of **1**

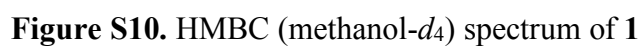

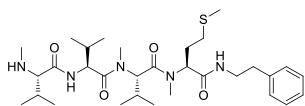

**Figure S12.**  $^{13}\text{C}$  NMR (500 MHz, methanol- $d_4$ ) spectrum of **2**

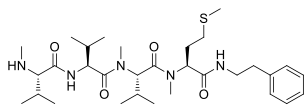

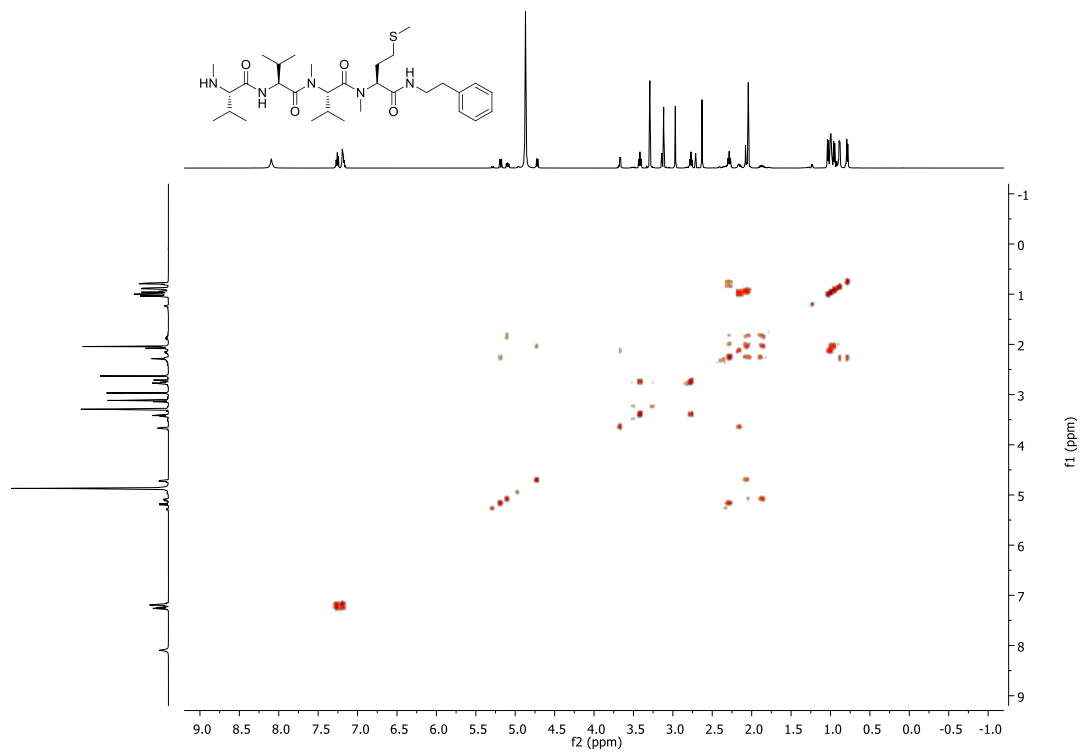

**Figure S13.** COSY (methanol-*d*<sub>4</sub>) spectrum of **2**

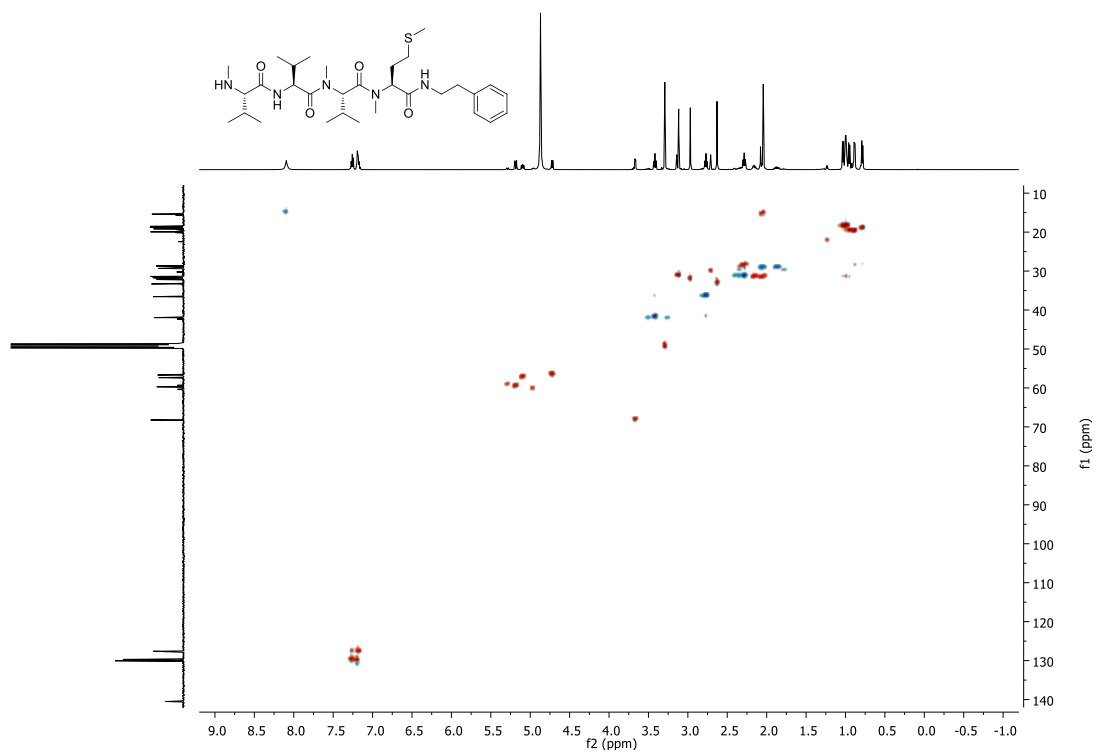

**Figure S14.** HSQC (methanol-*d*<sub>4</sub>) spectrum of **2**

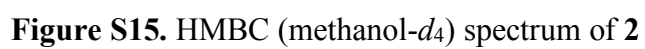

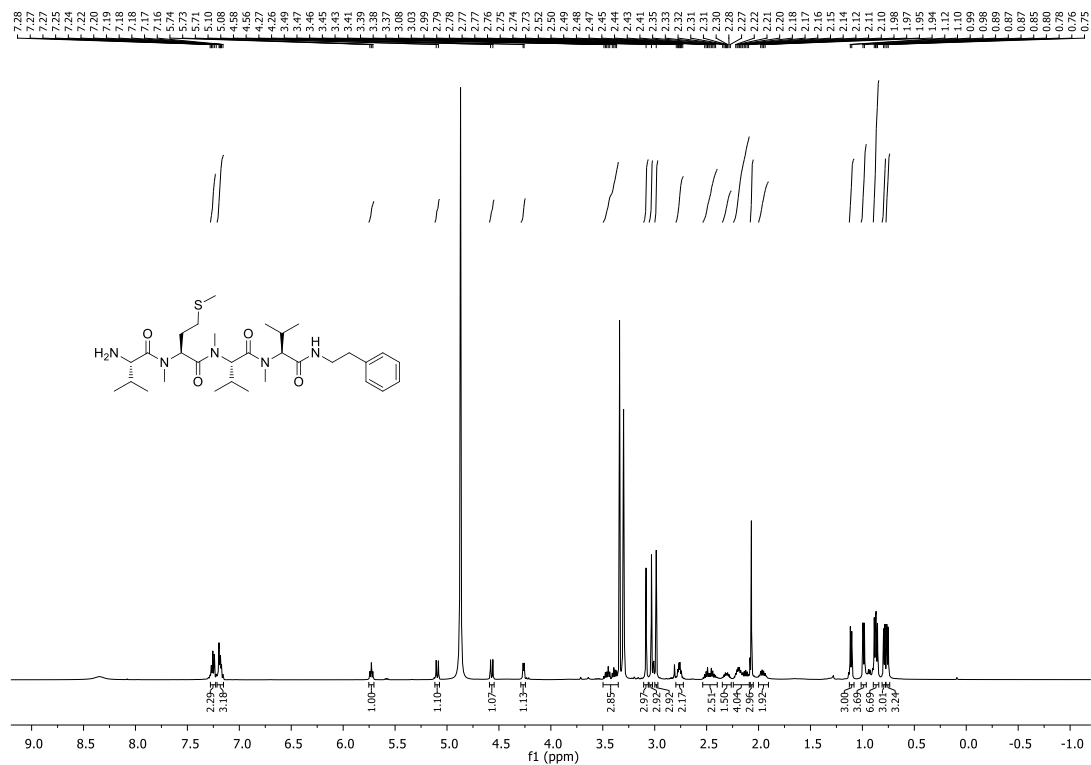

**Figure S16.** <sup>1</sup>H NMR (500 MHz, methanol-*d*<sub>4</sub>) spectrum of **3**

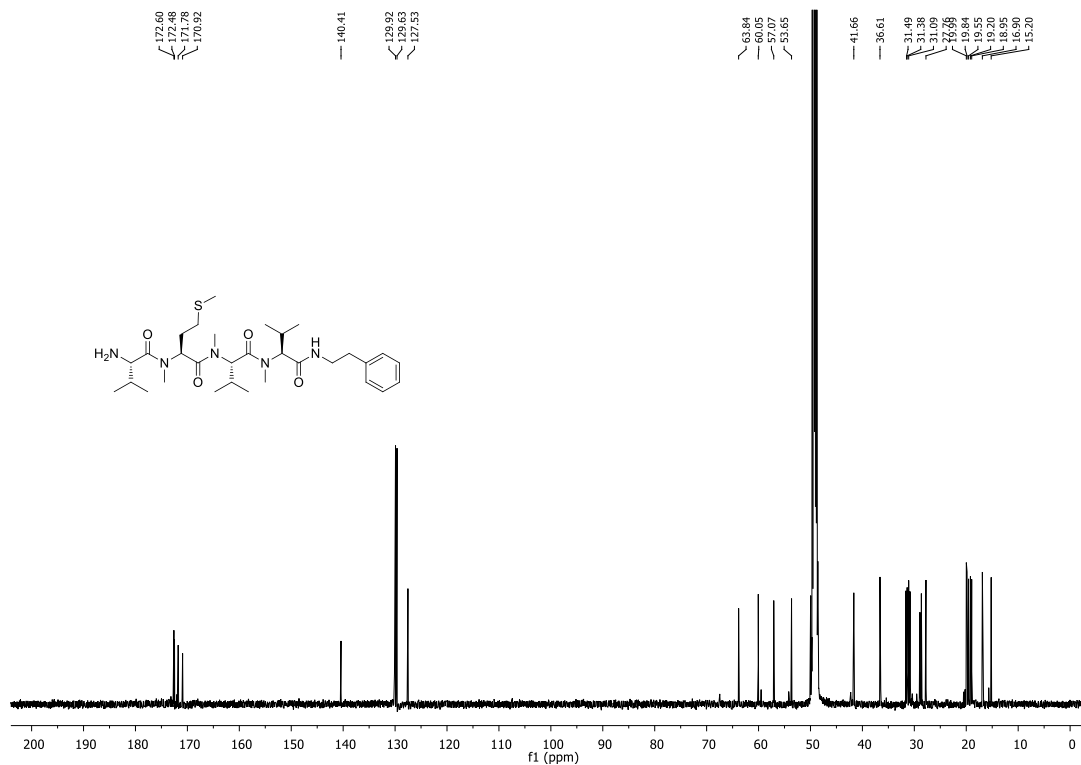

**Figure S17.** <sup>13</sup>C NMR (125 MHz, methanol-*d*<sub>4</sub>) spectrum of **3**



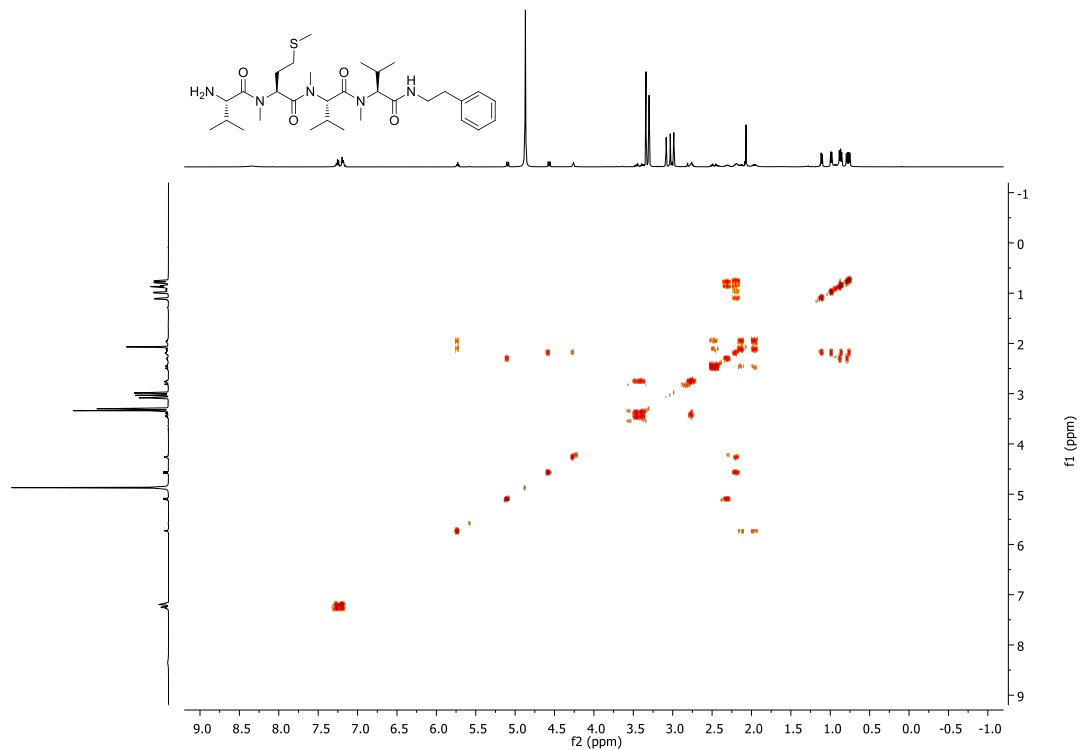

**Figure S18.** COSY (methanol-*d*<sub>4</sub>) spectrum of **3**

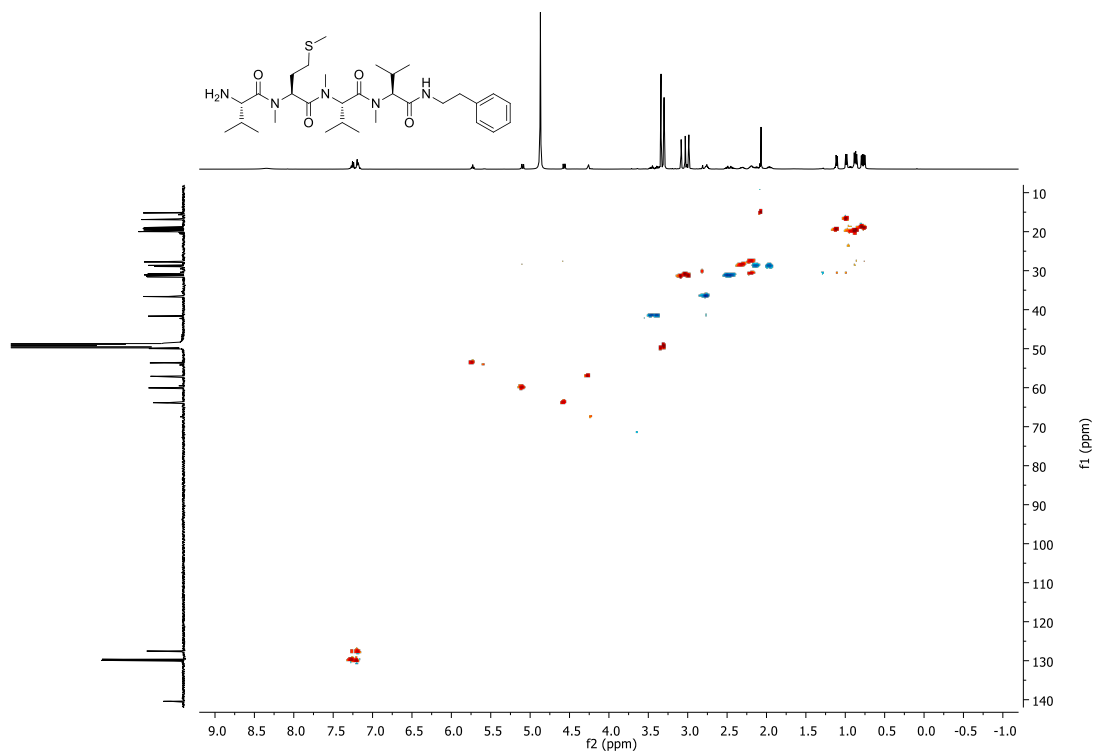

**Figure S19.** HSQC (methanol-*d*<sub>4</sub>) spectrum of **3**

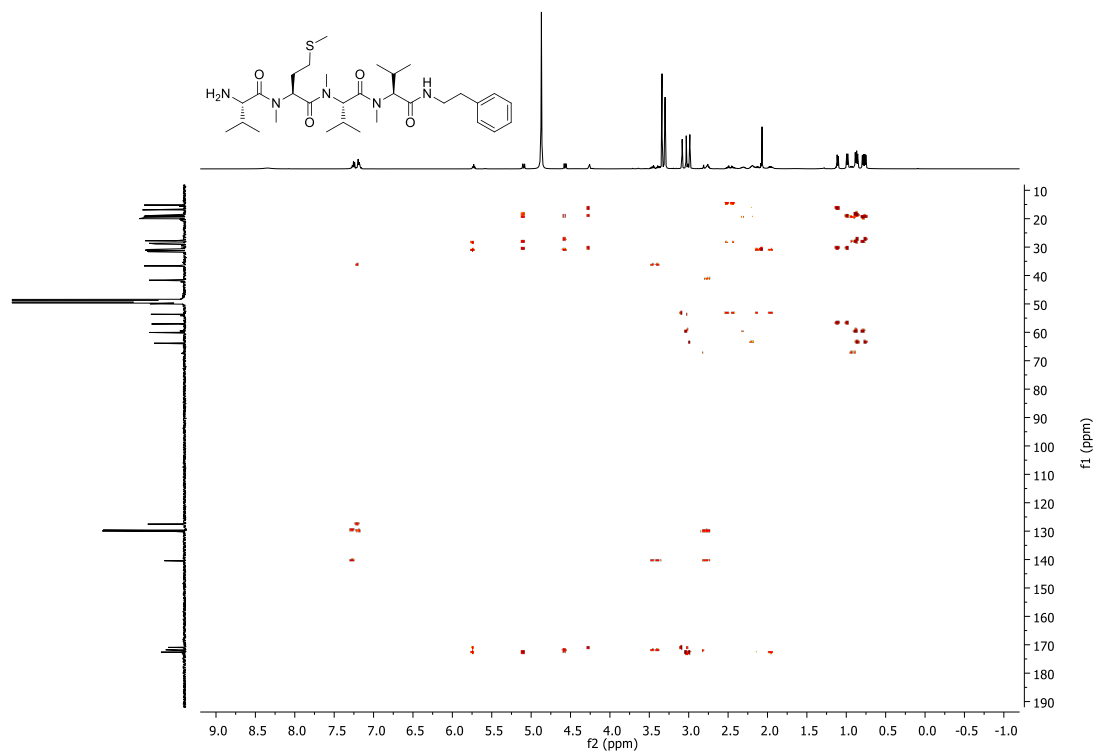

**Figure S20.** HMBC (methanol- $d_4$ ) spectrum of **3**

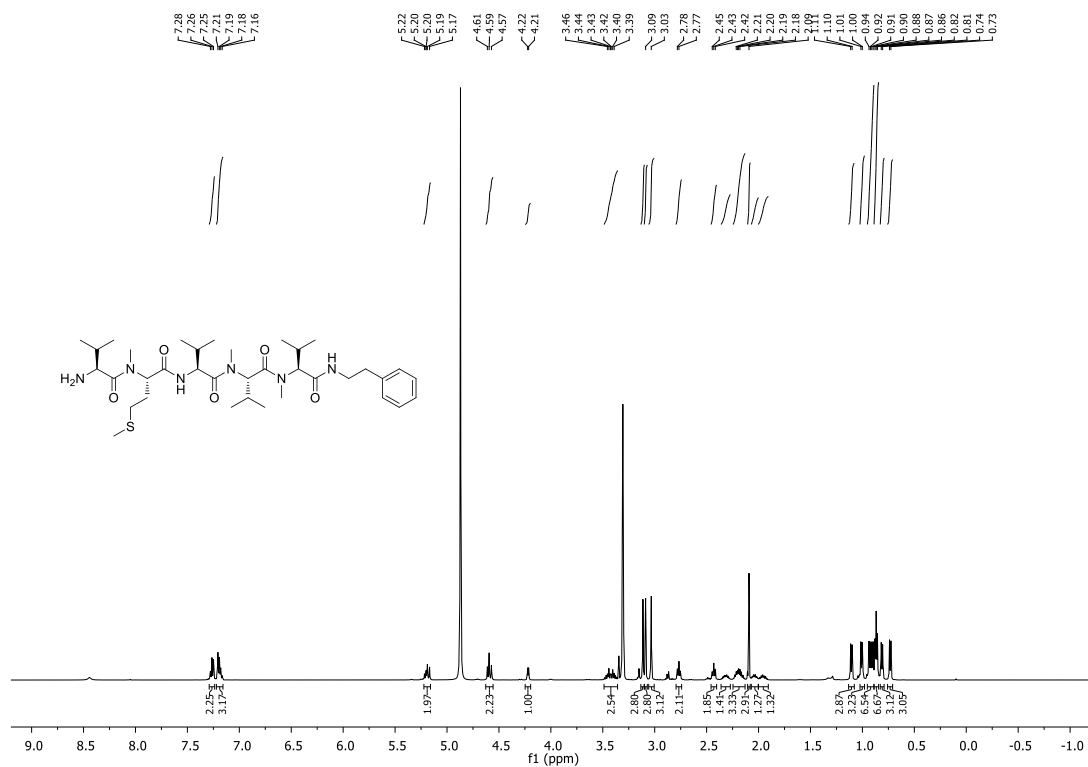

**Figure S21.** <sup>1</sup>H NMR (500 MHz, methanol-*d*<sub>4</sub>) spectrum of **4**

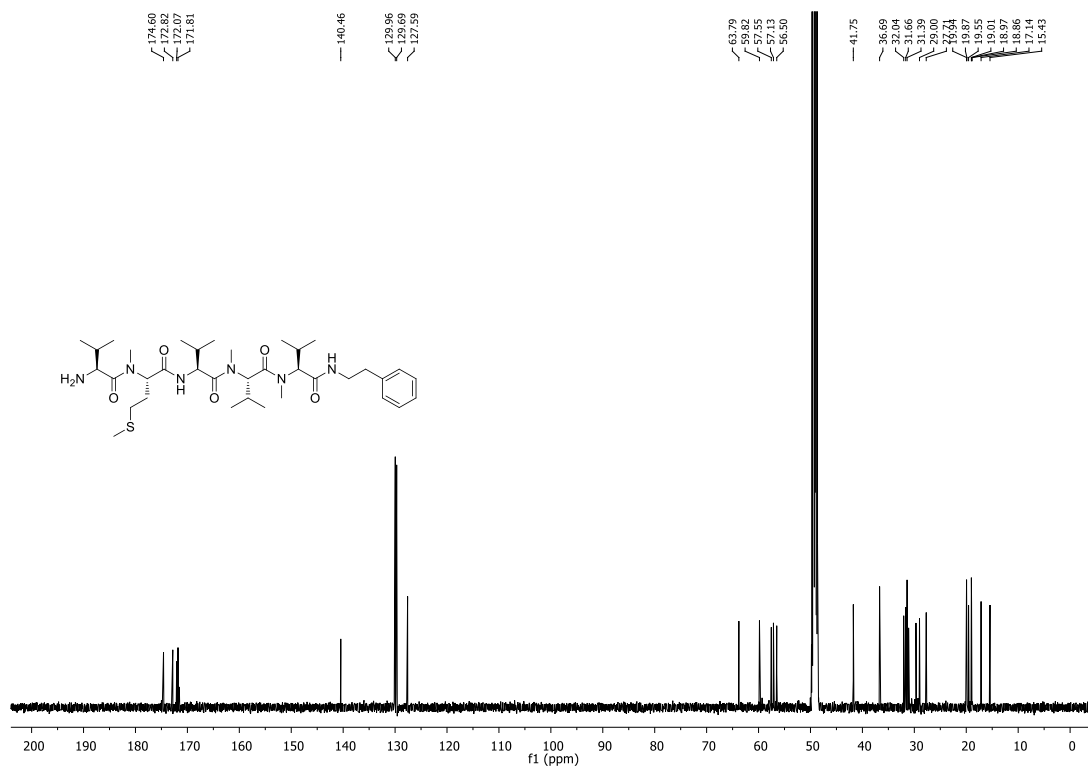

**Figure S22.** <sup>13</sup>C NMR (125 MHz, methanol-*d*<sub>4</sub>) spectrum of **4**

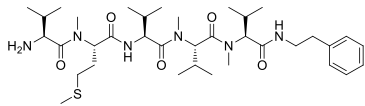

**Figure S23.** COSY (methanol-*d*<sub>4</sub>) spectrum of **4**

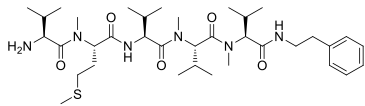

**Figure S24.** HSQC (methanol-*d*<sub>4</sub>) spectrum of **4**

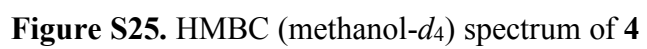



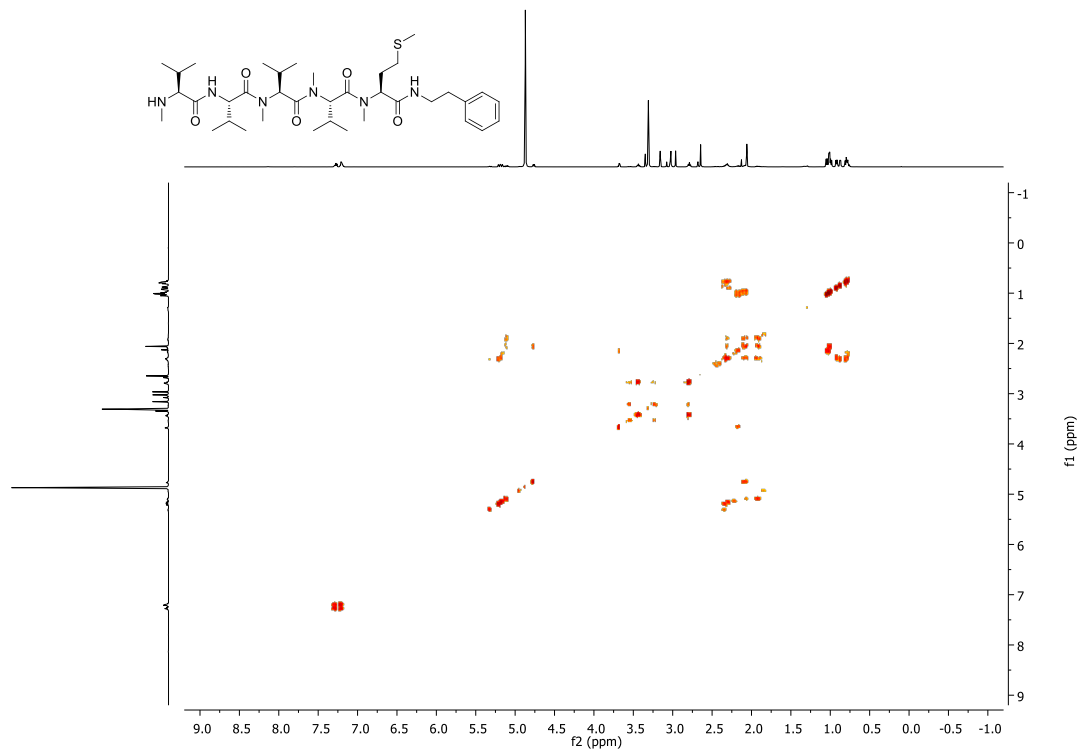

**Figure S28.** COSY (methanol- $d_4$ ) spectrum of **5**

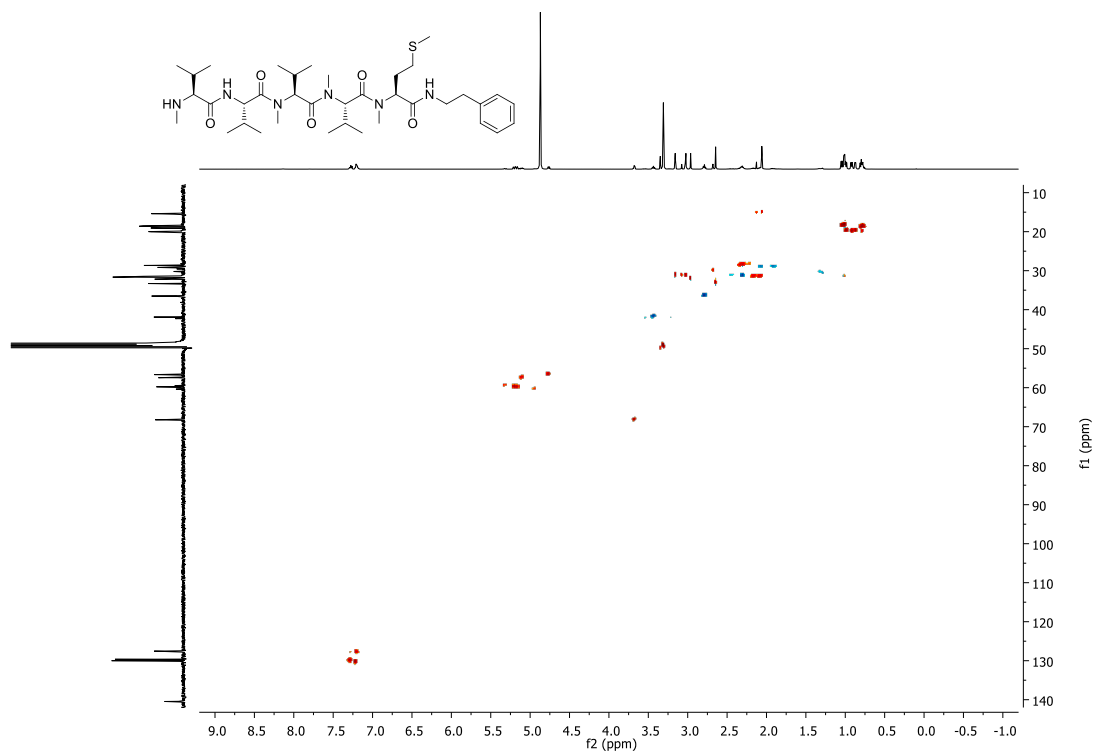

**Figure S29.** HSQC (methanol- $d_4$ ) spectrum of **5**

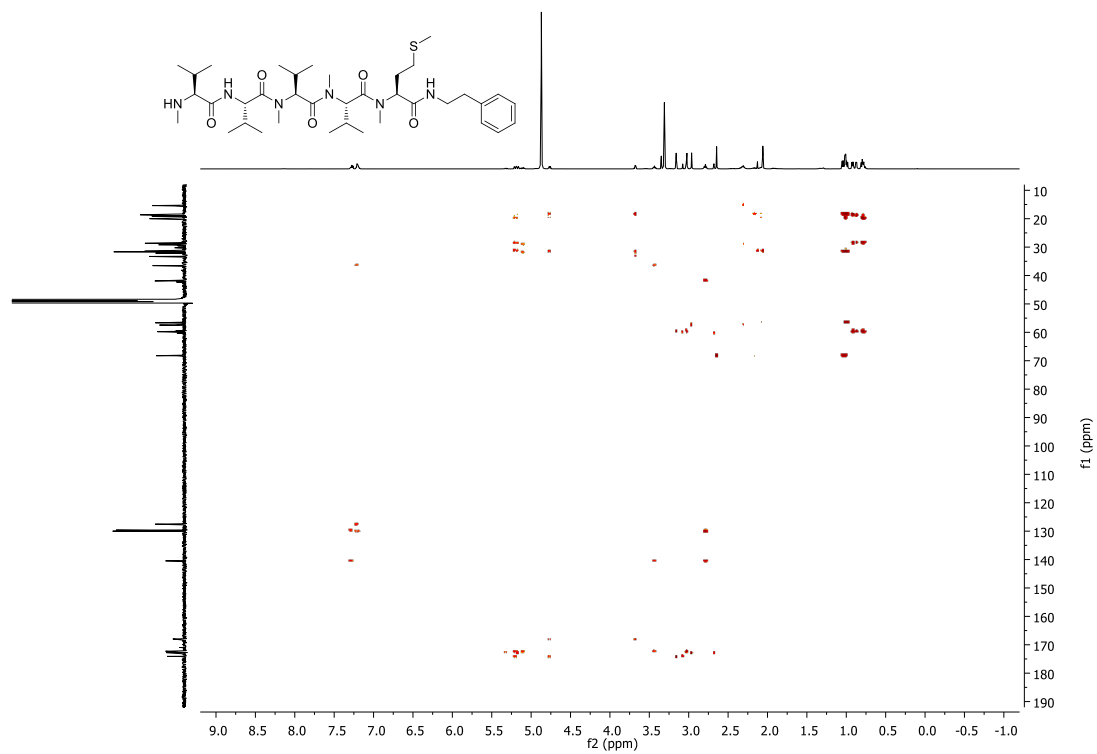

**Figure S30.** HMBC (methanol- $d_4$ ) spectrum of **5**





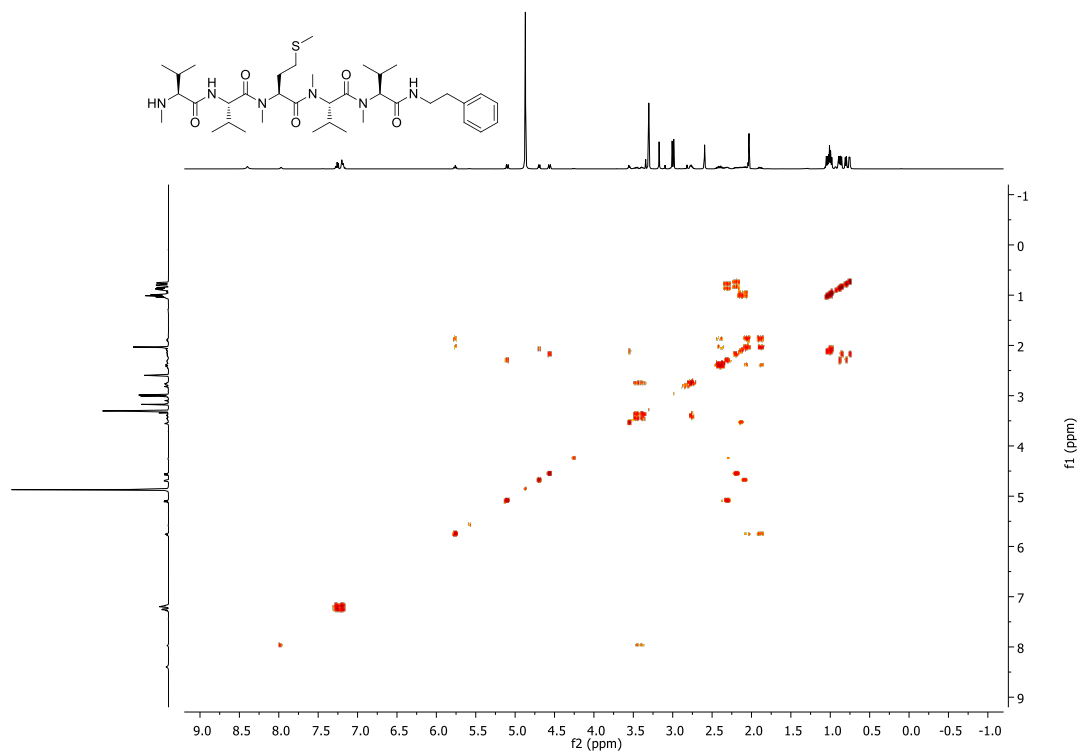

**Figure S33.** COSY (methanol- $d_4$ ) spectrum of **6**

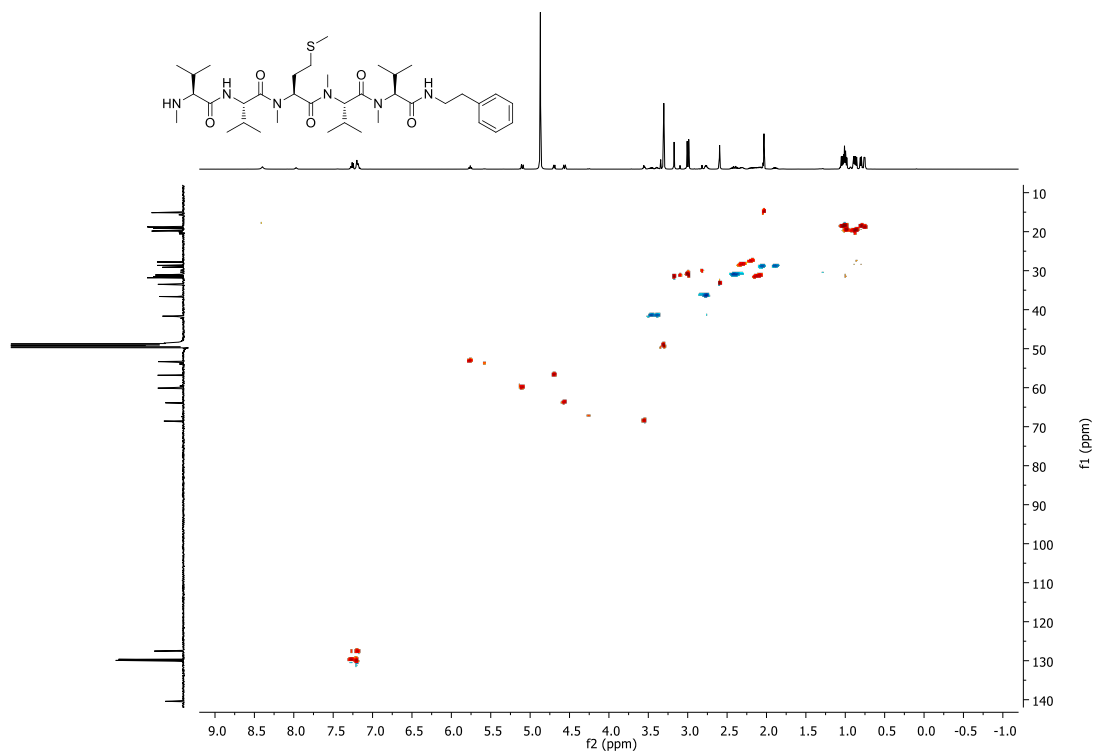

**Figure S34.** HSQC (methanol- $d_4$ ) spectrum of **6**

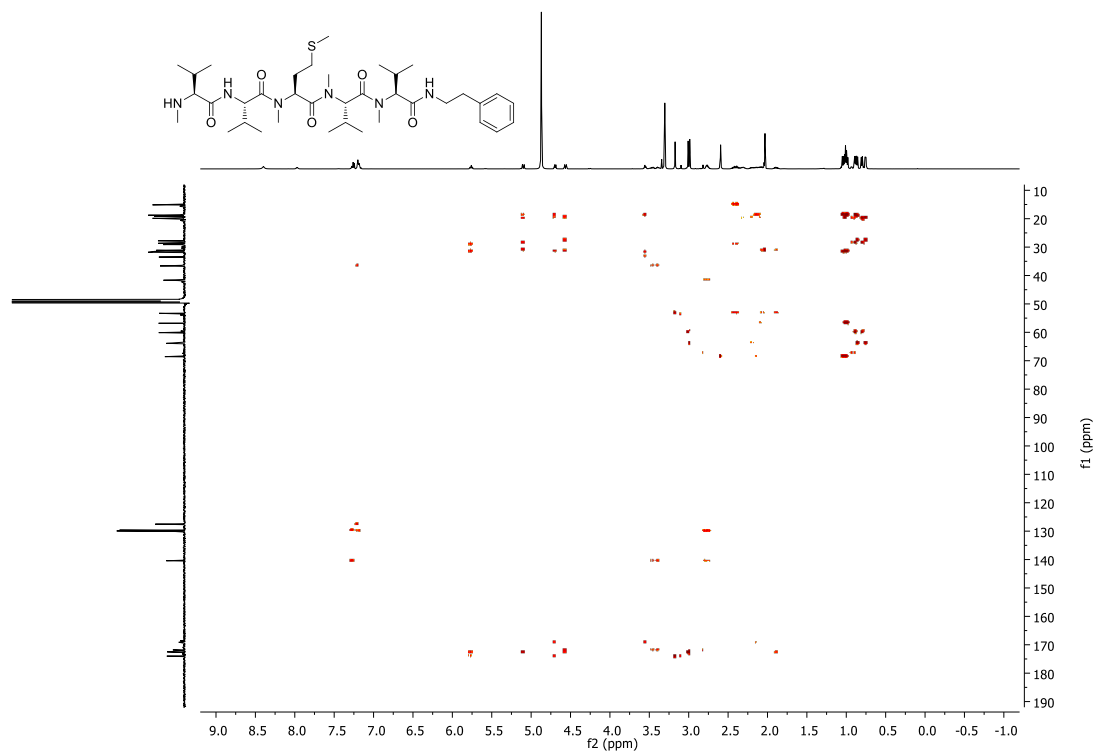

**Figure S35.** HMBC (methanol-*d*<sub>4</sub>) spectrum of **6**

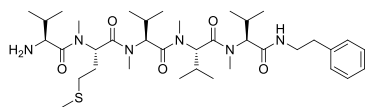

Chemical structure of compound 10 is shown above the spectrum. The structure is a complex molecule with multiple amide and ester groups, and a phenyl ring. The spectrum shows peaks corresponding to the protons in the molecule, with chemical shifts ranging from approximately 15 to 175 ppm. The x-axis is labeled "f1 (ppm)".

44



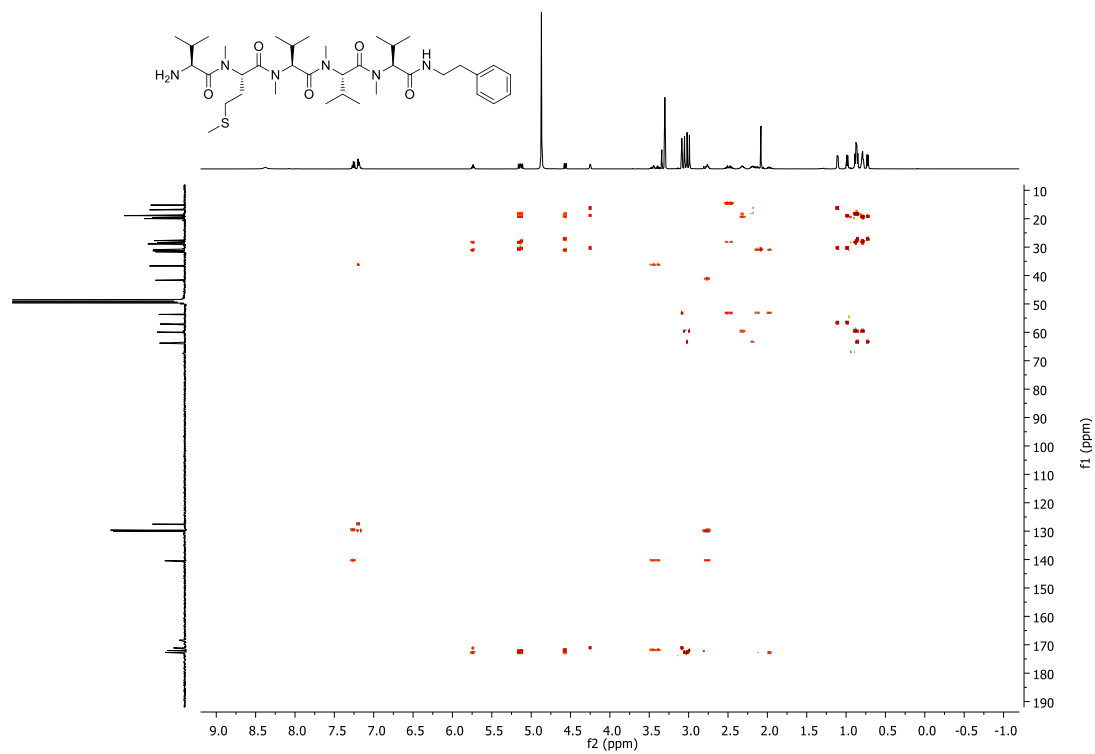

**Figure S40.** HMBC (methanol- $d_4$ ) spectrum of 7

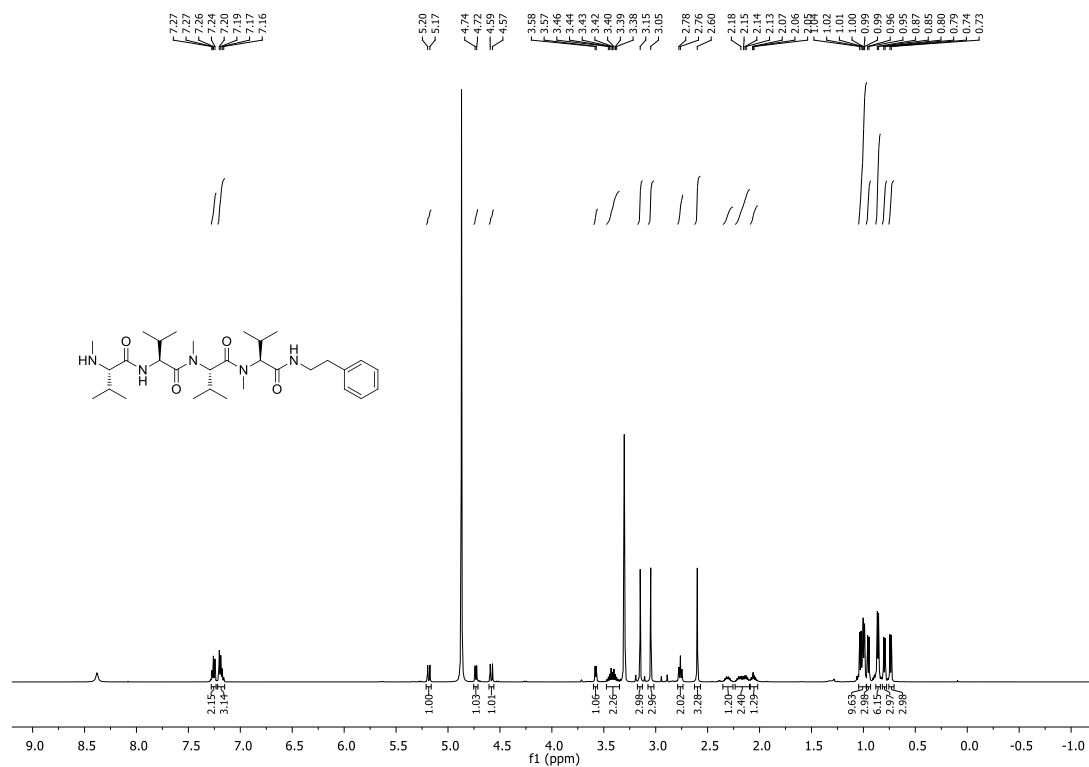

**Figure S41.** <sup>1</sup>H NMR (500 MHz, methanol-*d*<sub>4</sub>) spectrum of **10**

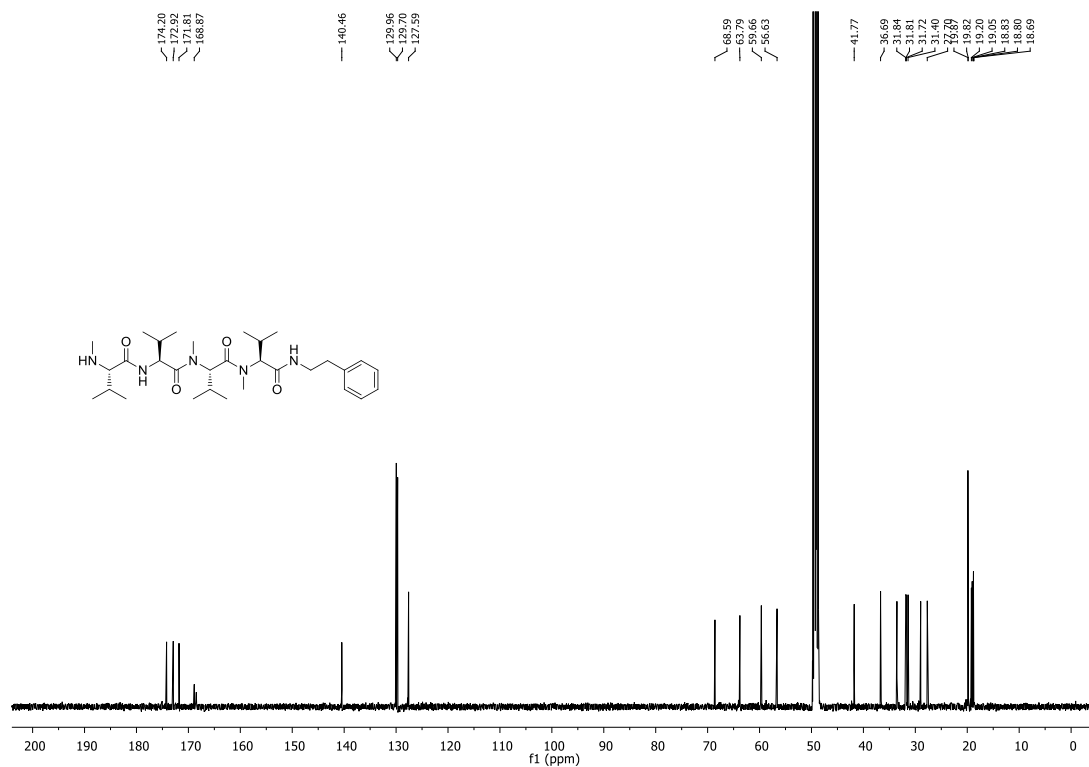

**Figure S42.** <sup>13</sup>C NMR (125 MHz, methanol-*d*<sub>4</sub>) spectrum of **10**

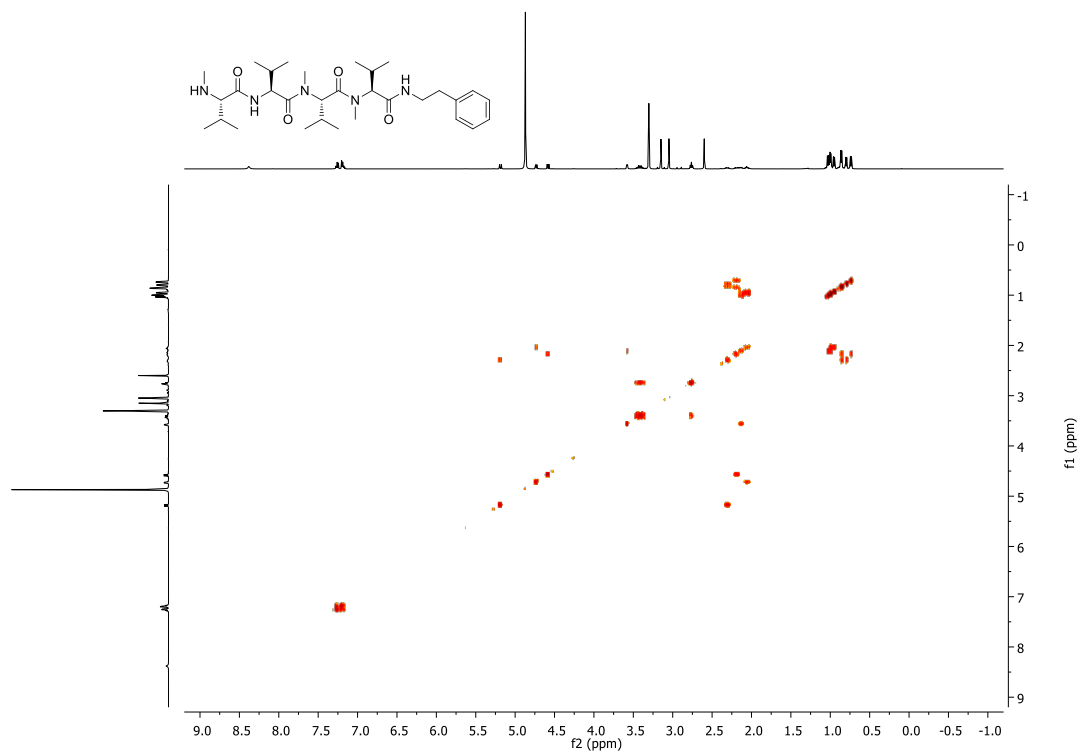

**Figure S43.** COSY (methanol- $d_4$ ) spectrum of **10**

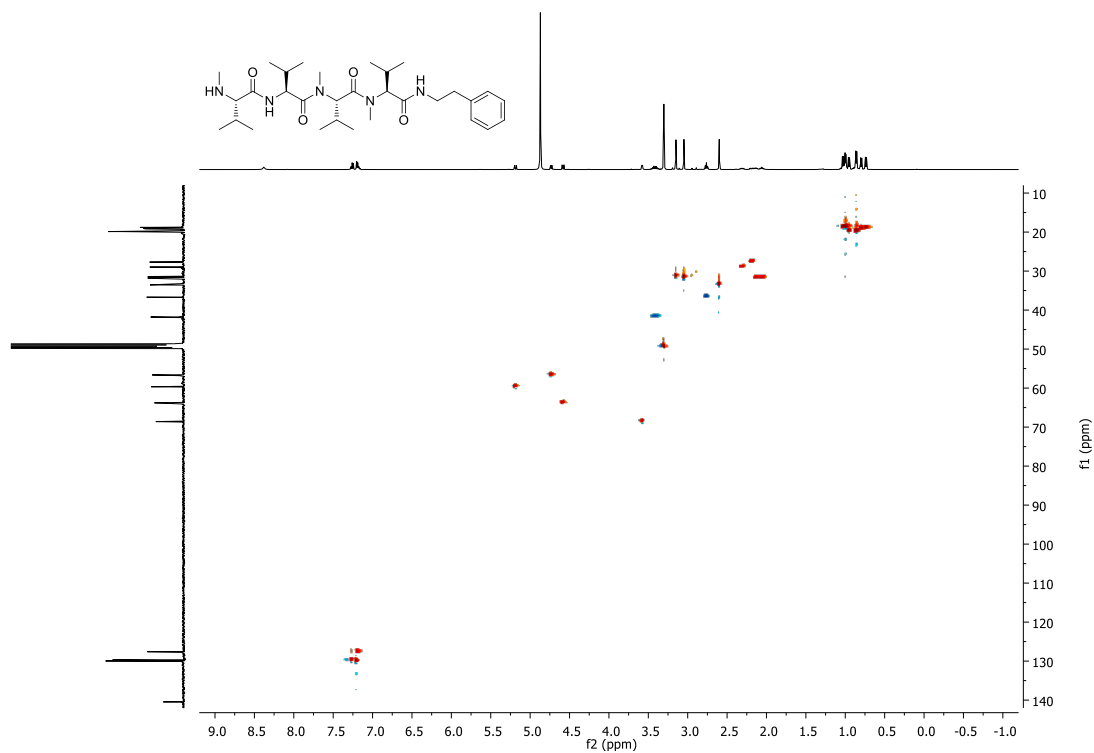

**Figure S44.** HSQC (methanol- $d_4$ ) spectrum of **10**



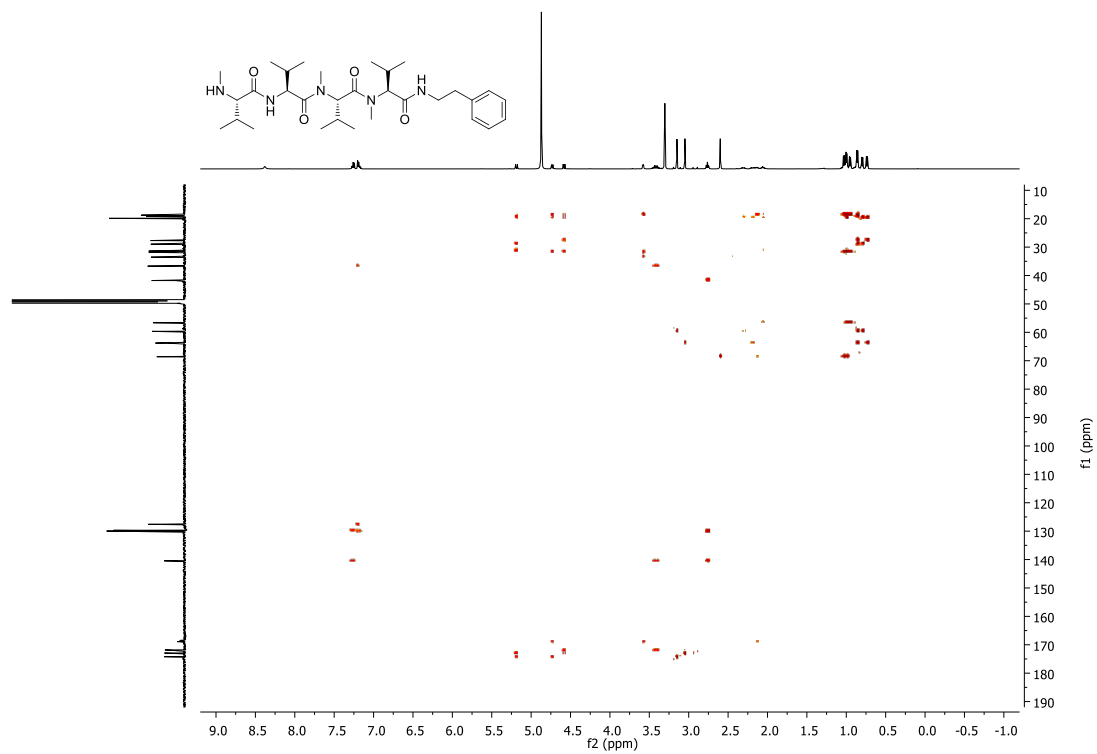

**Figure S45.** HMBC (methanol-*d*<sub>4</sub>) spectrum of **10**

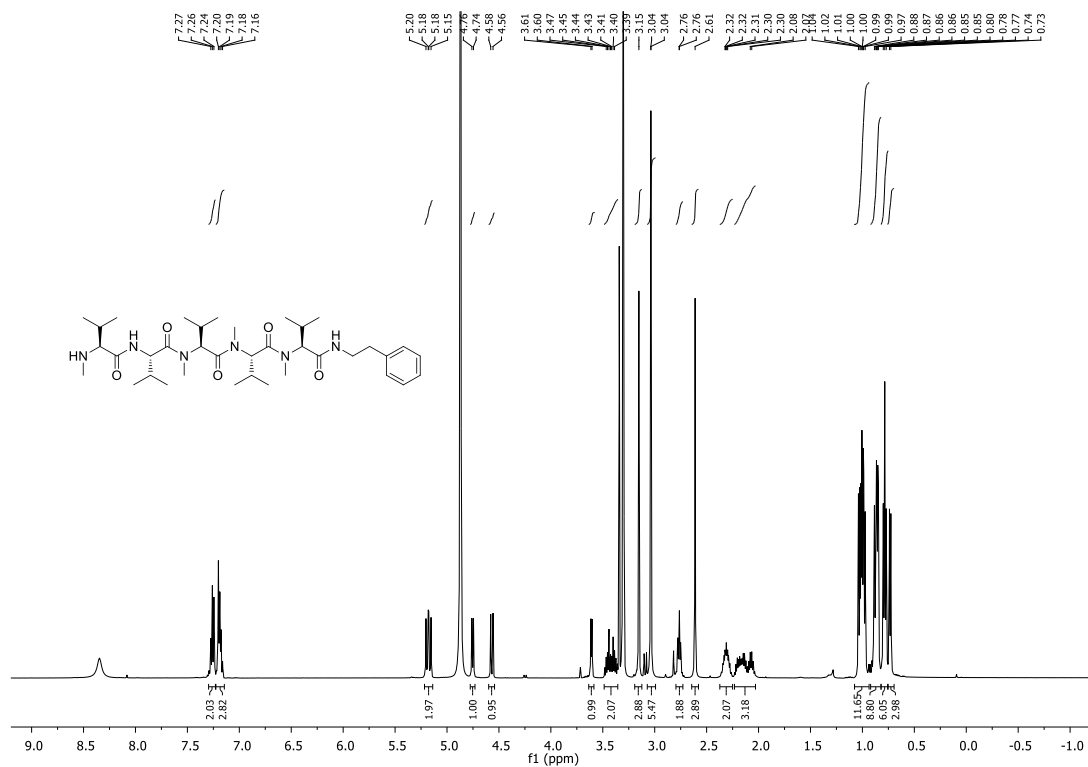

Figure S46. <sup>1</sup>H NMR (500 MHz, methanol-*d*<sub>4</sub>) spectrum of 12

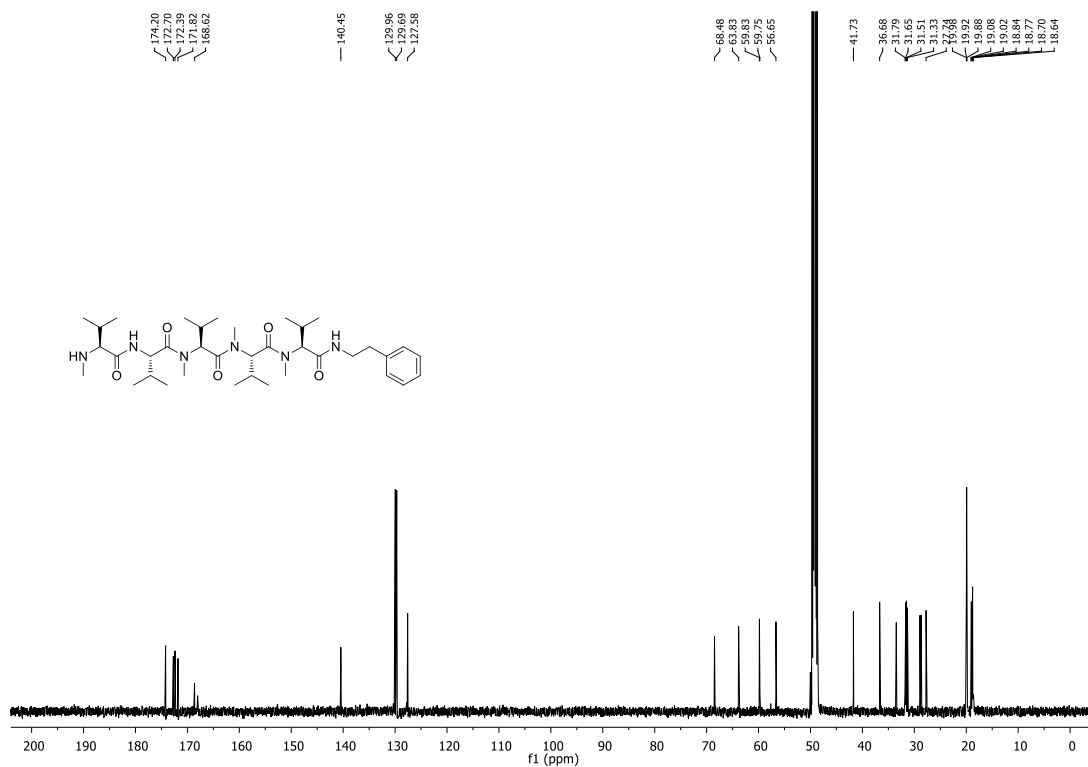

Figure S47. <sup>13</sup>C NMR (125 MHz, methanol-*d*<sub>4</sub>) spectrum of 12

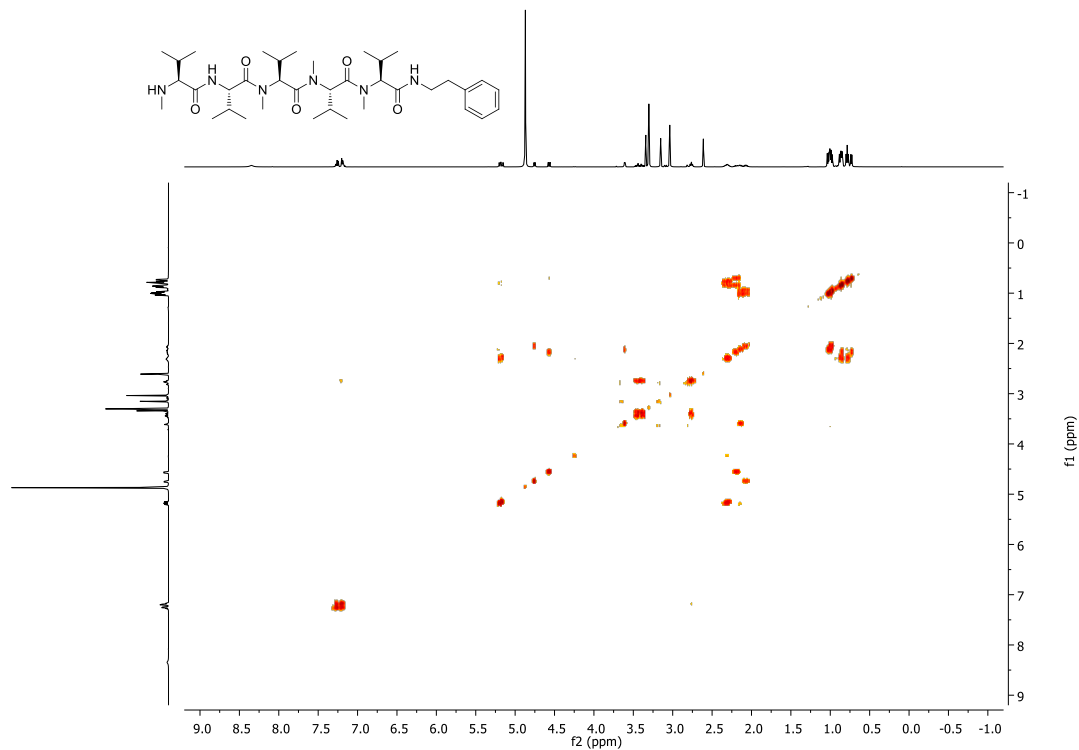

**Figure S48.** COSY (methanol- $d_4$ ) spectrum of **12**

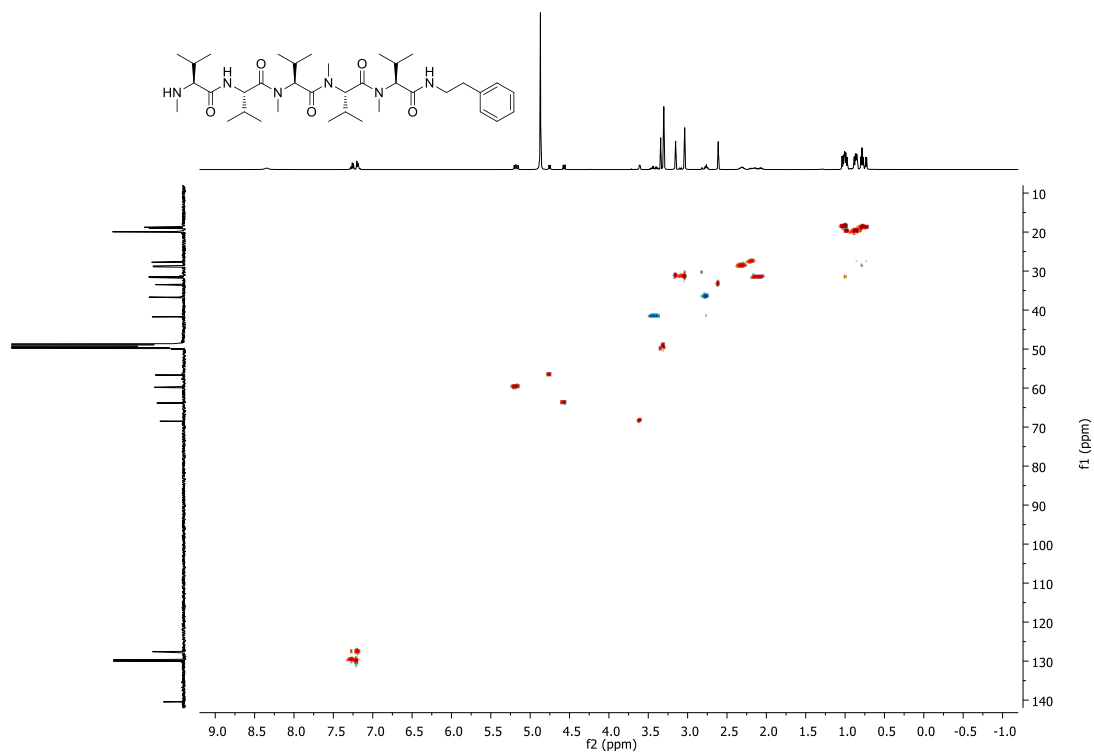

**Figure S49.** HSQC (methanol- $d_4$ ) spectrum of **12**

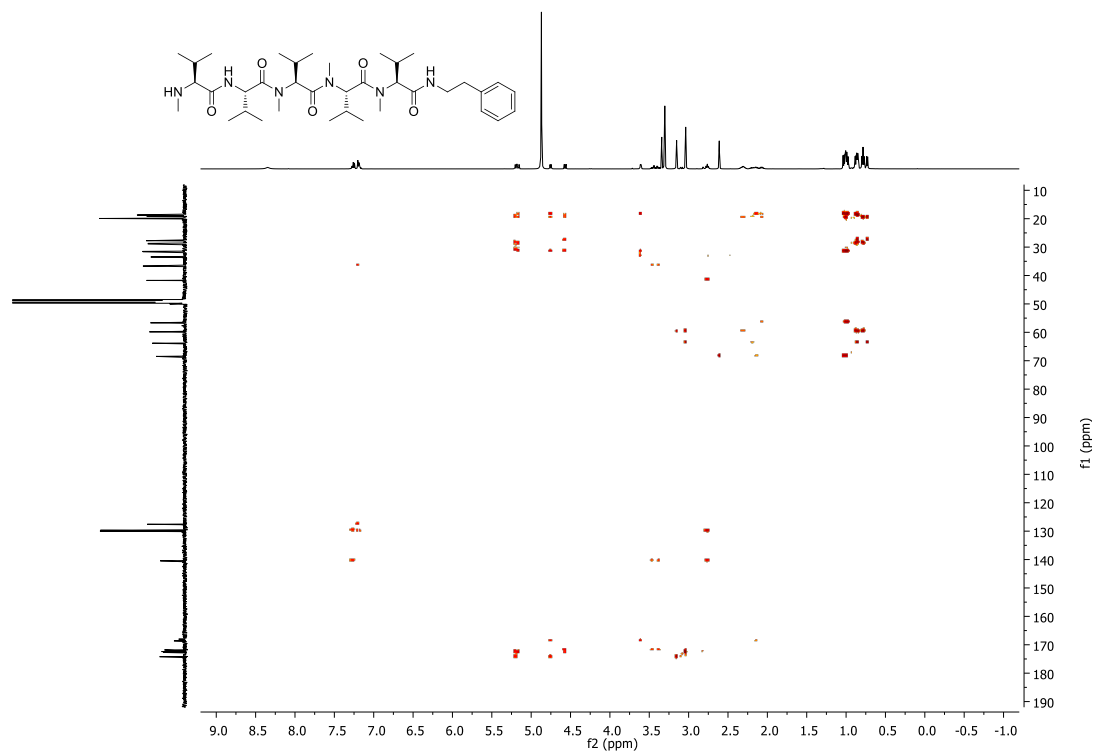

**Figure S50.** HMBC (methanol-*d*<sub>4</sub>) spectrum of **12**

## References

- (1) Wesche, F.; Adihou, H.; Kaiser, A.; Wurglics, M.; Schubert-Zsilavecz, M.; Kaiser, M.; Bode, H. B. *J. Med. Chem.* **2018**, *61*, 3930–3938.
- (2) Sable, G. A.; Park, J.; Kim, H.; Lim, S. J.; Jang, S.; Lim, D. *Eur. J. Org. Chem.* **2015**, 7043–7052.
- (3) Cai, X.; Nowak, S.; Wesche, F.; Bischoff, I.; Kaiser, M.; Fürst, R.; Bode, H. B. *Nat. Chem.* **2017**, *9*, 379–386.
- (4) Schimming O., Fleischhacker F., Nollmann F. I., Bode H. B. *Chembiochem* **2014**, *15*, 1290–1294.
